# Supplementary figures and images for: Alginate Hydrogels Reinforced by Dehydration under Stress—Application to a Soft Magnetic Actuator
Source: MDPI journal article supplement (doi:10.3390/gels9010039), 2023-01-03

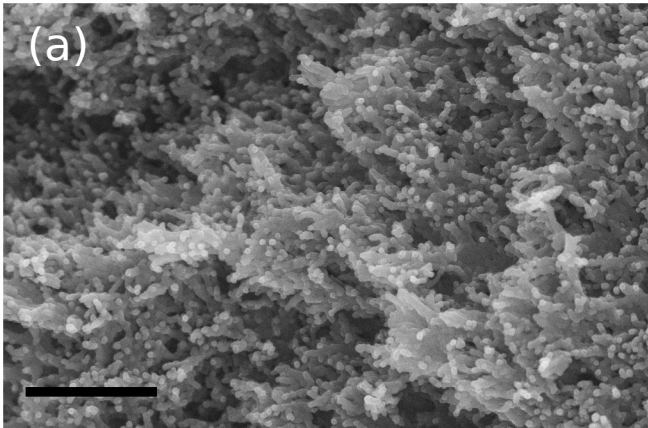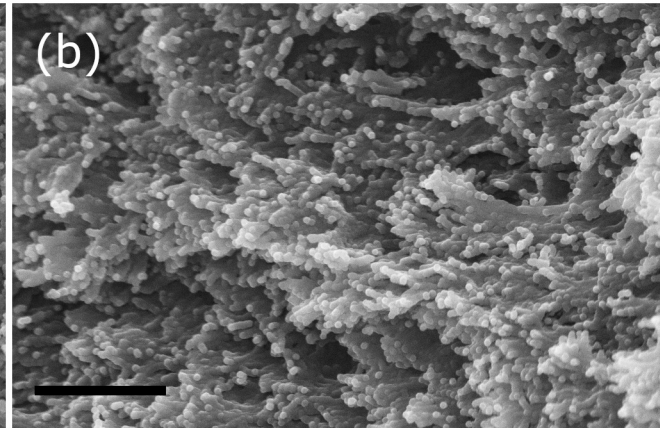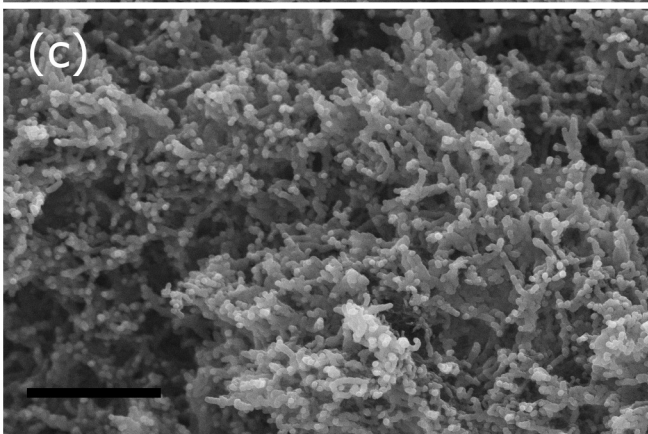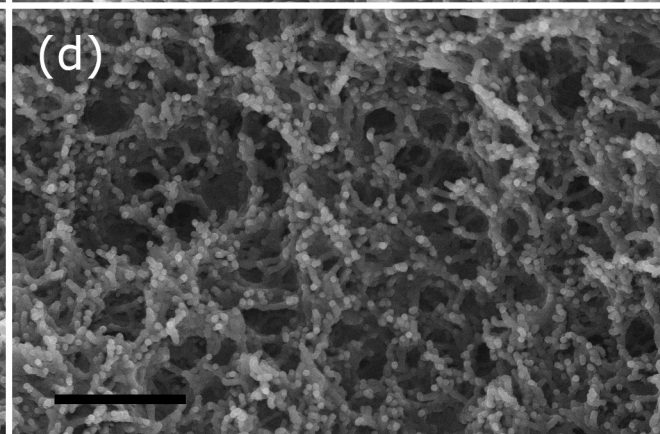

Supplement: s1 [file s1]

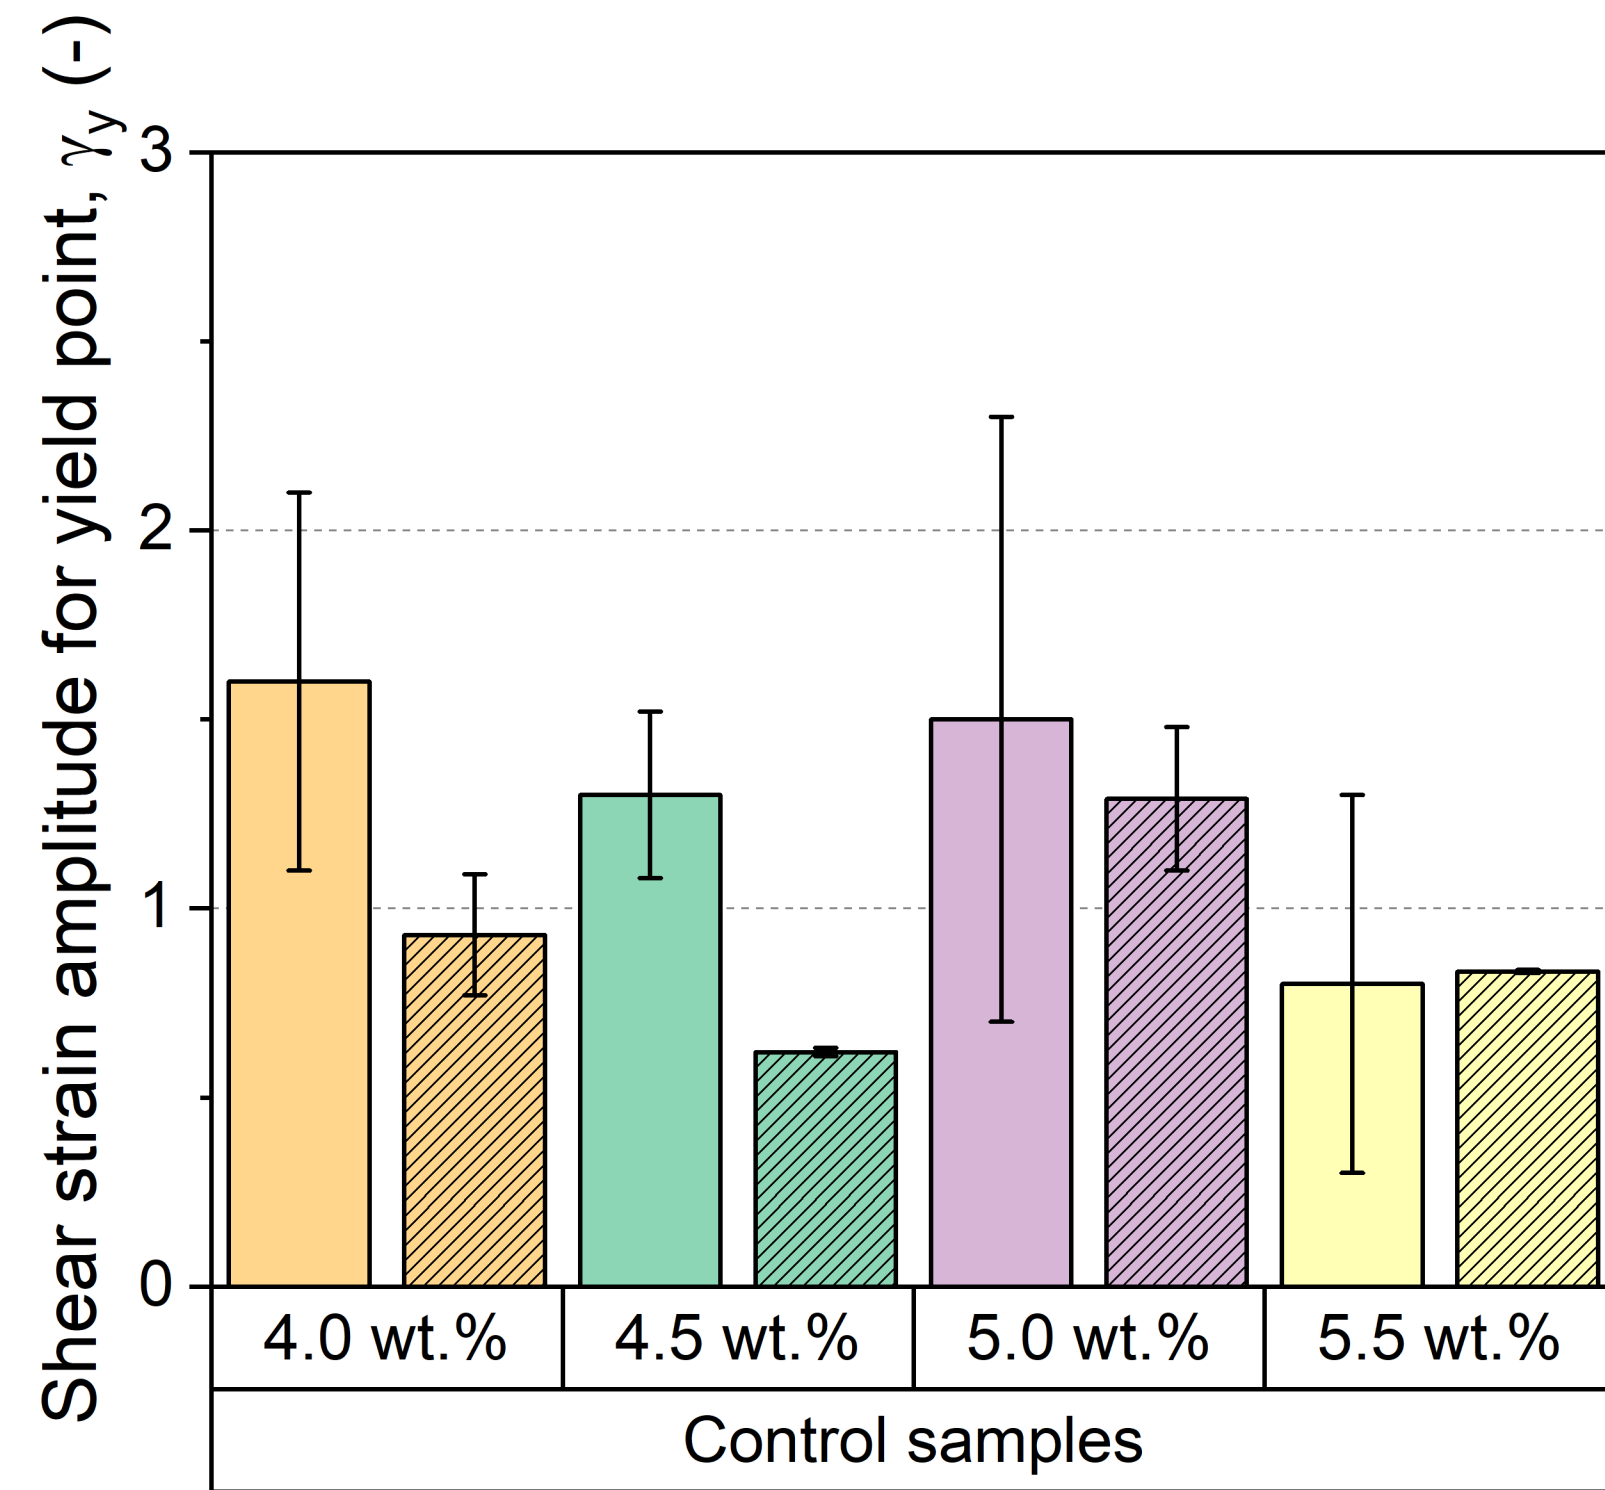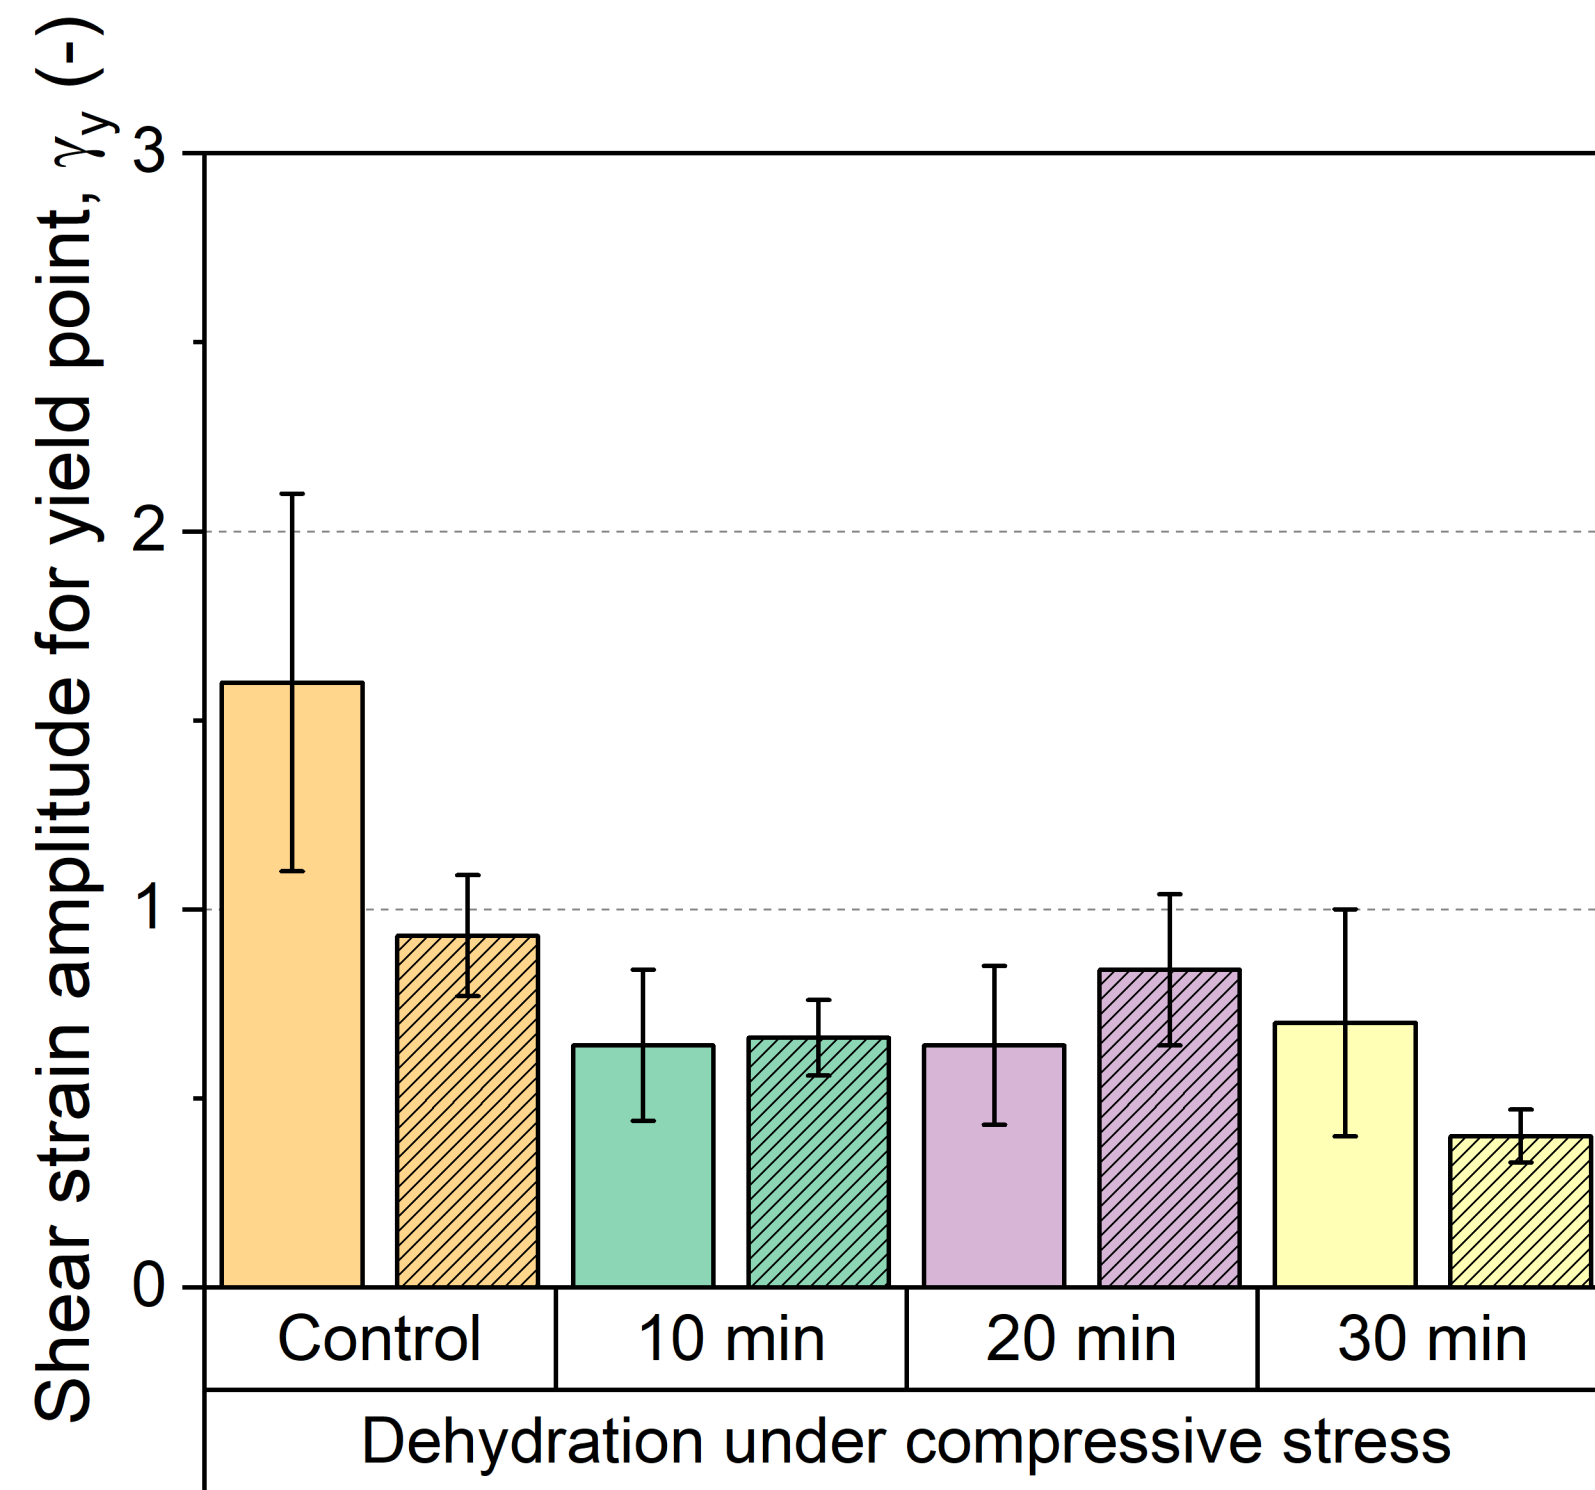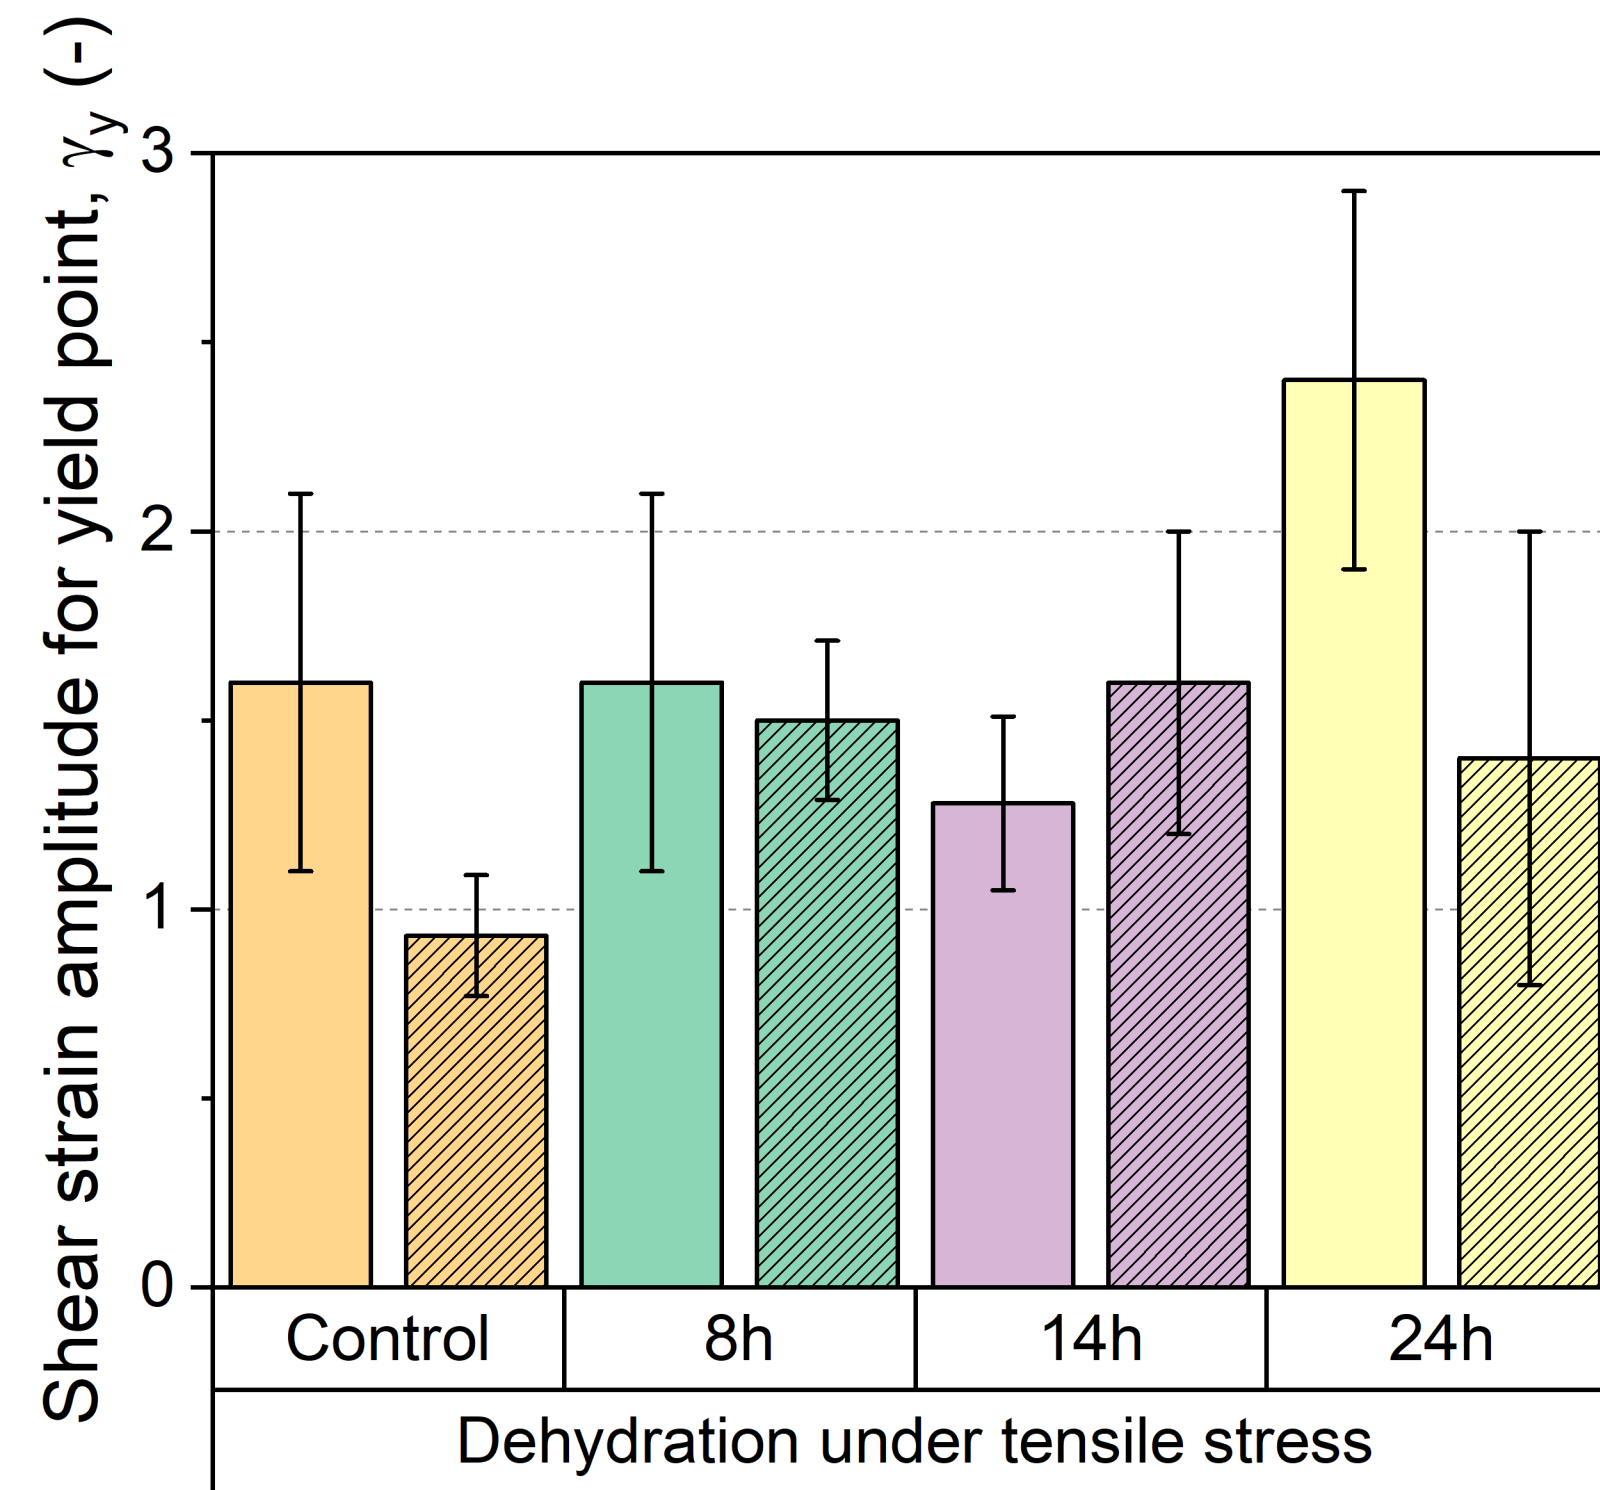

Supplement: s1 [file s1]

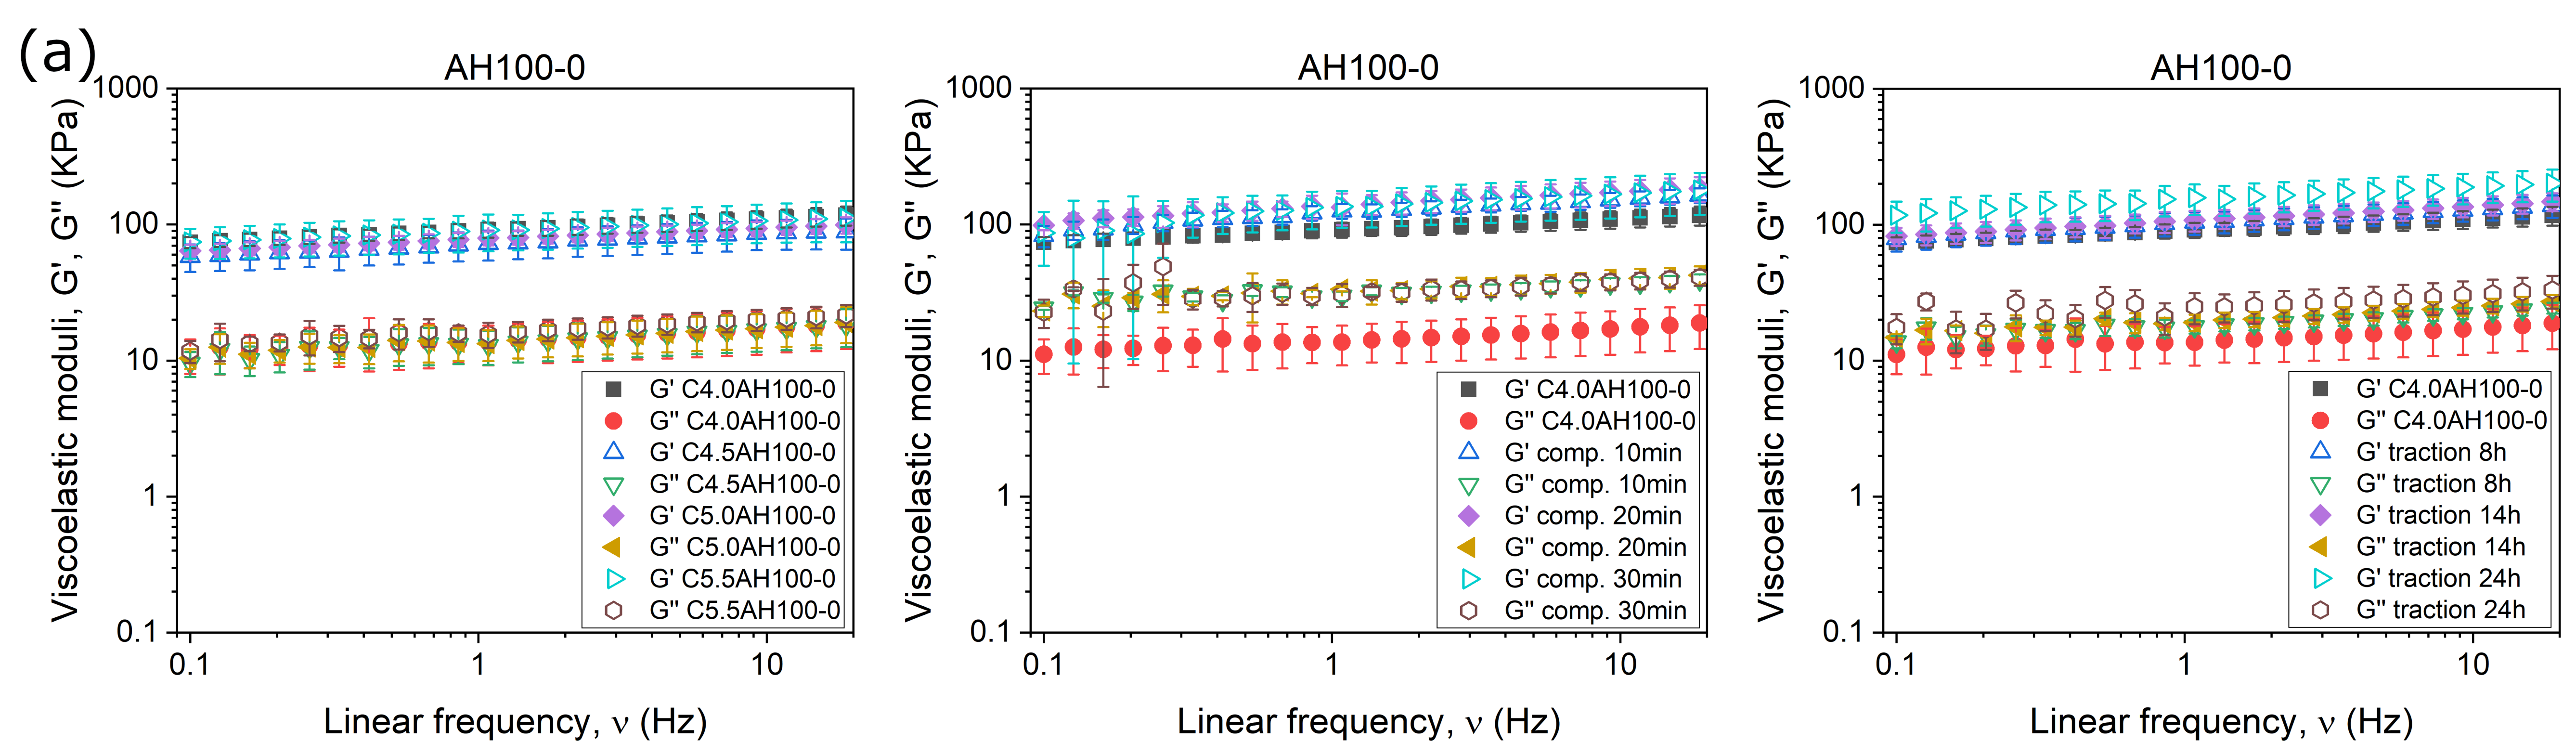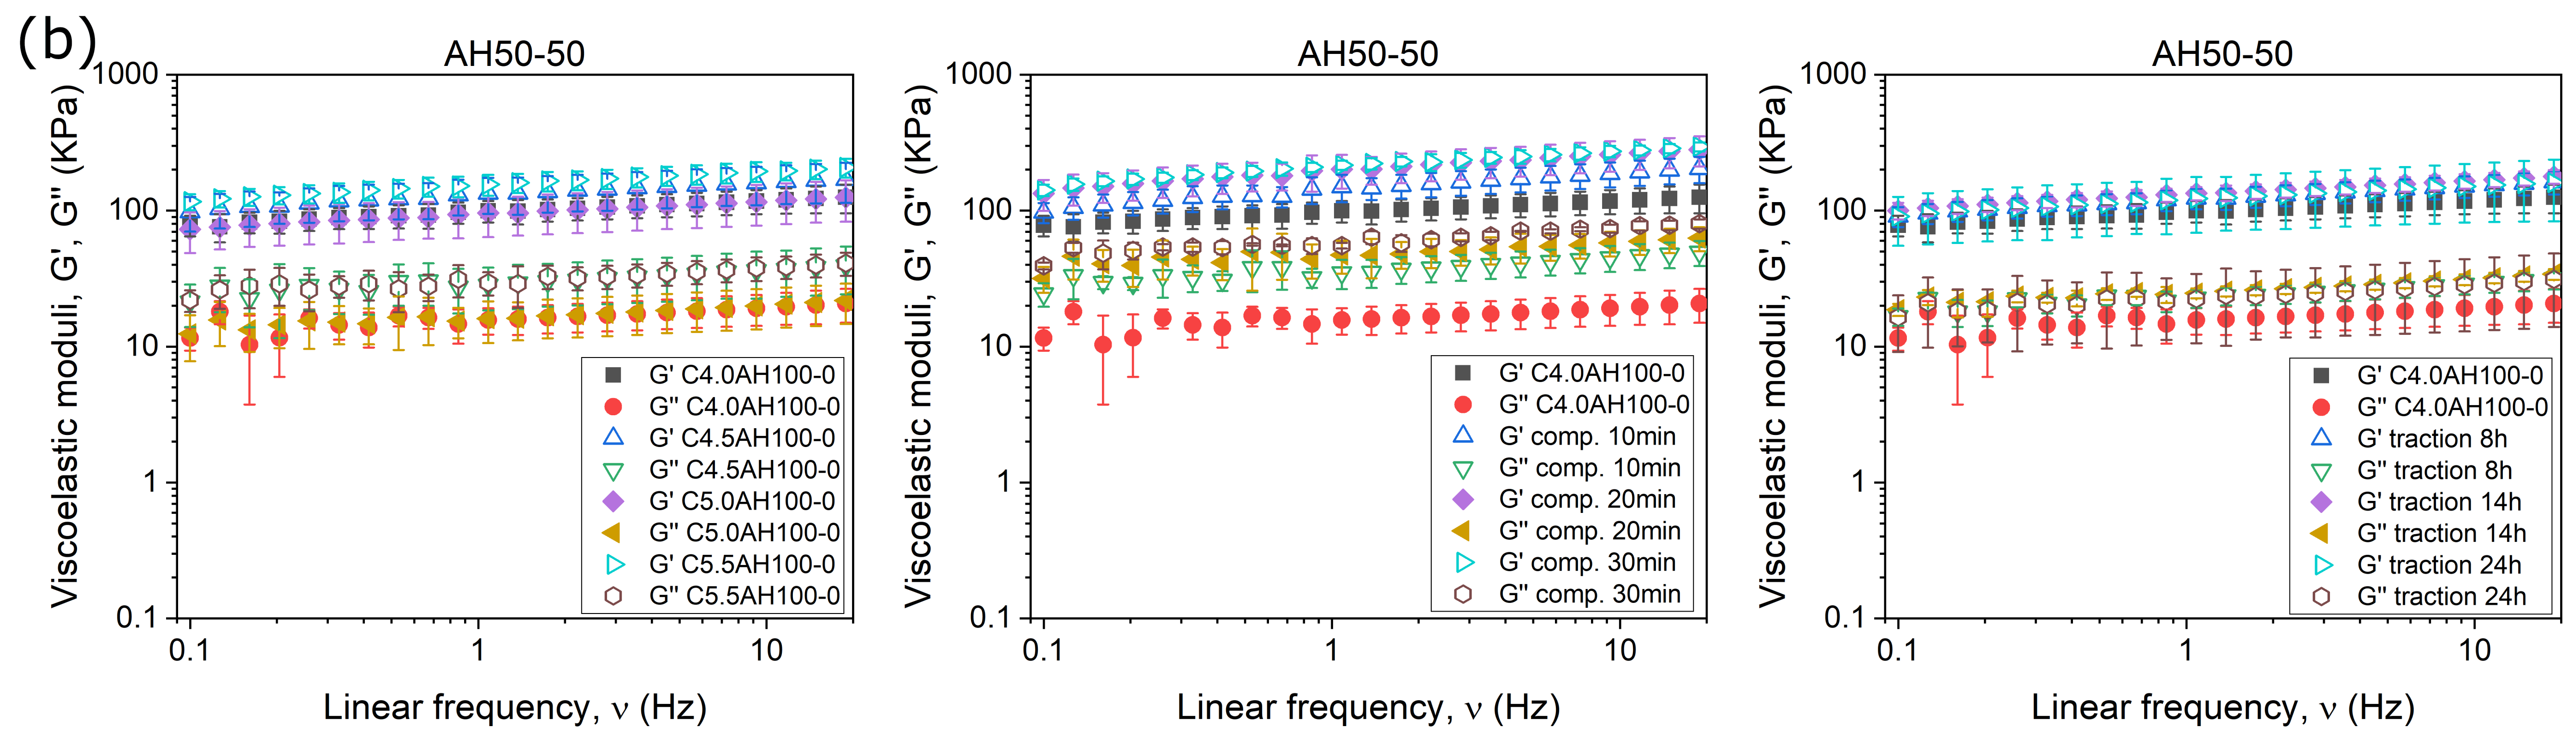

Supplement: s1 [file s1]

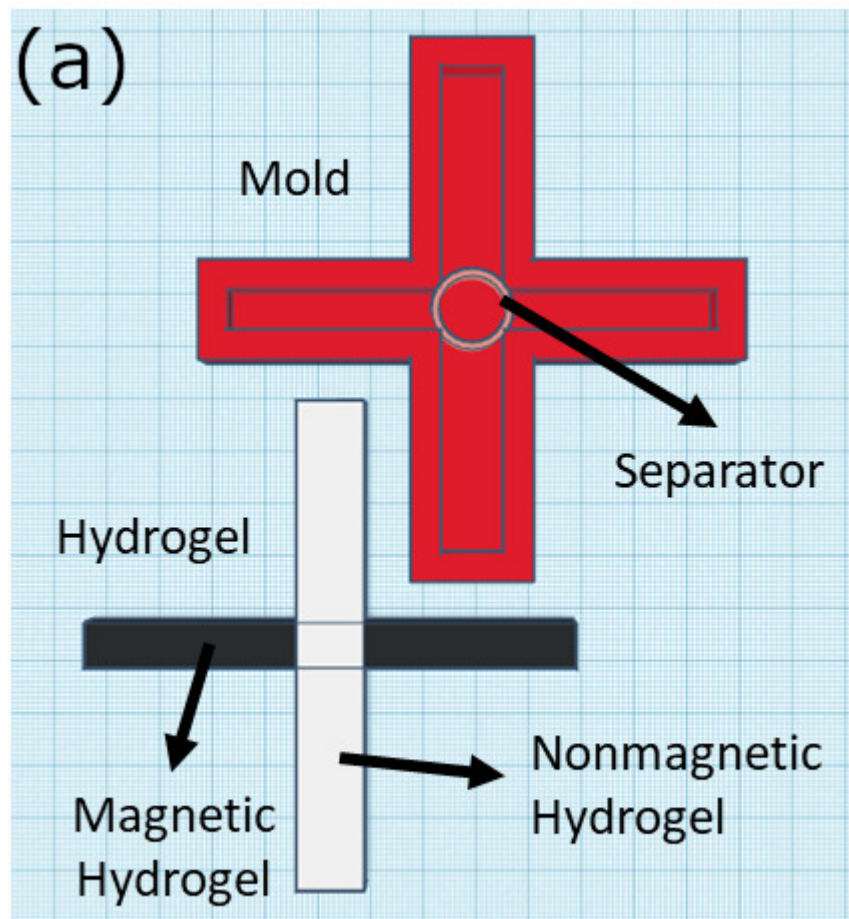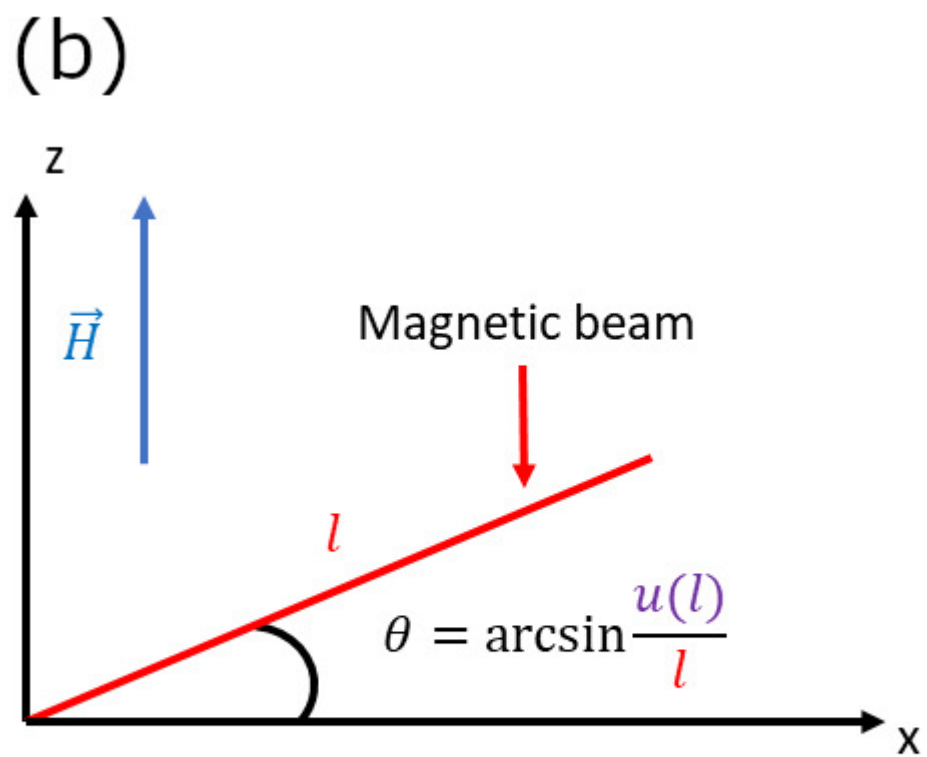

Supplement: s1 [file s1]

Pristine

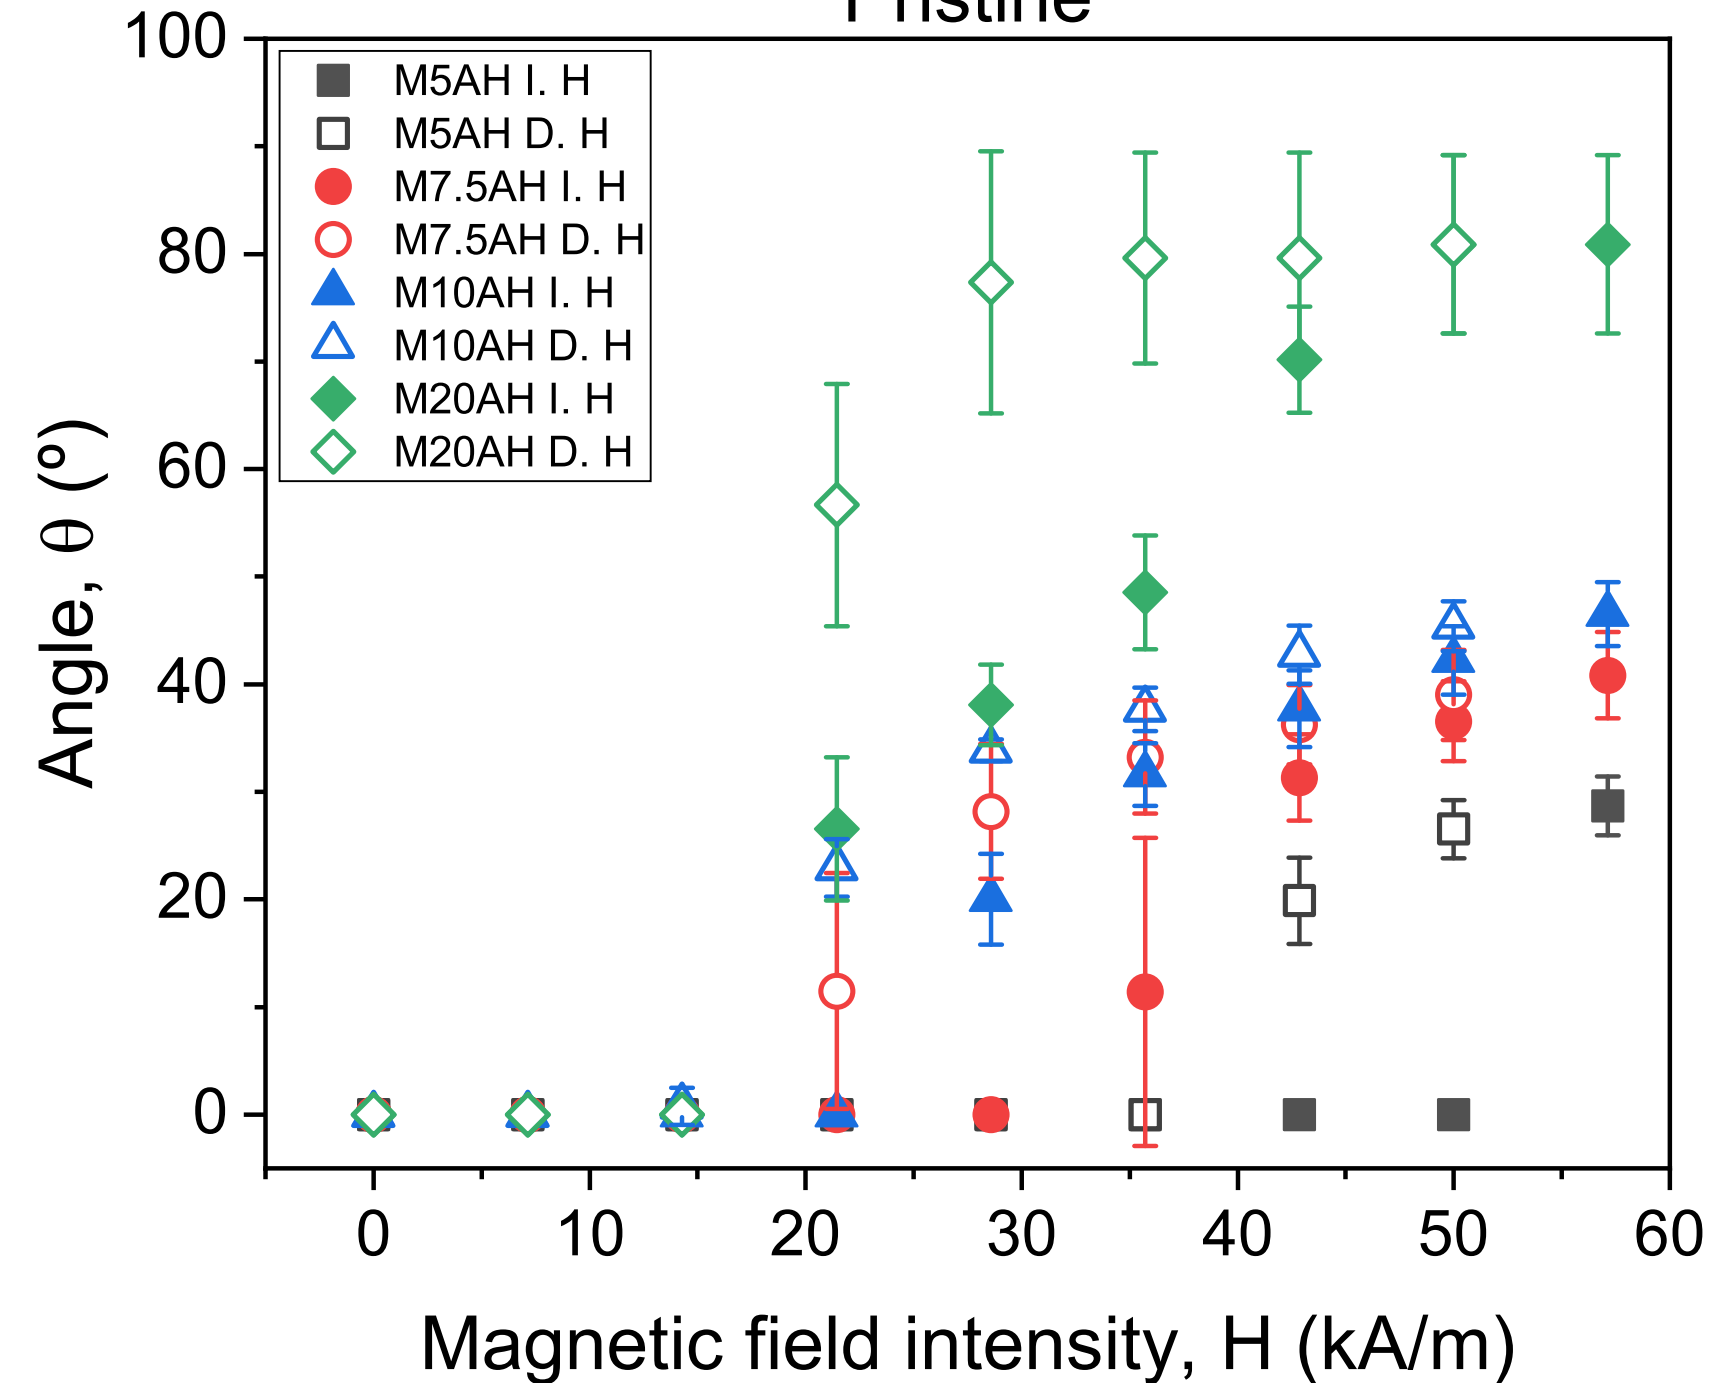

First dehydration (FD)

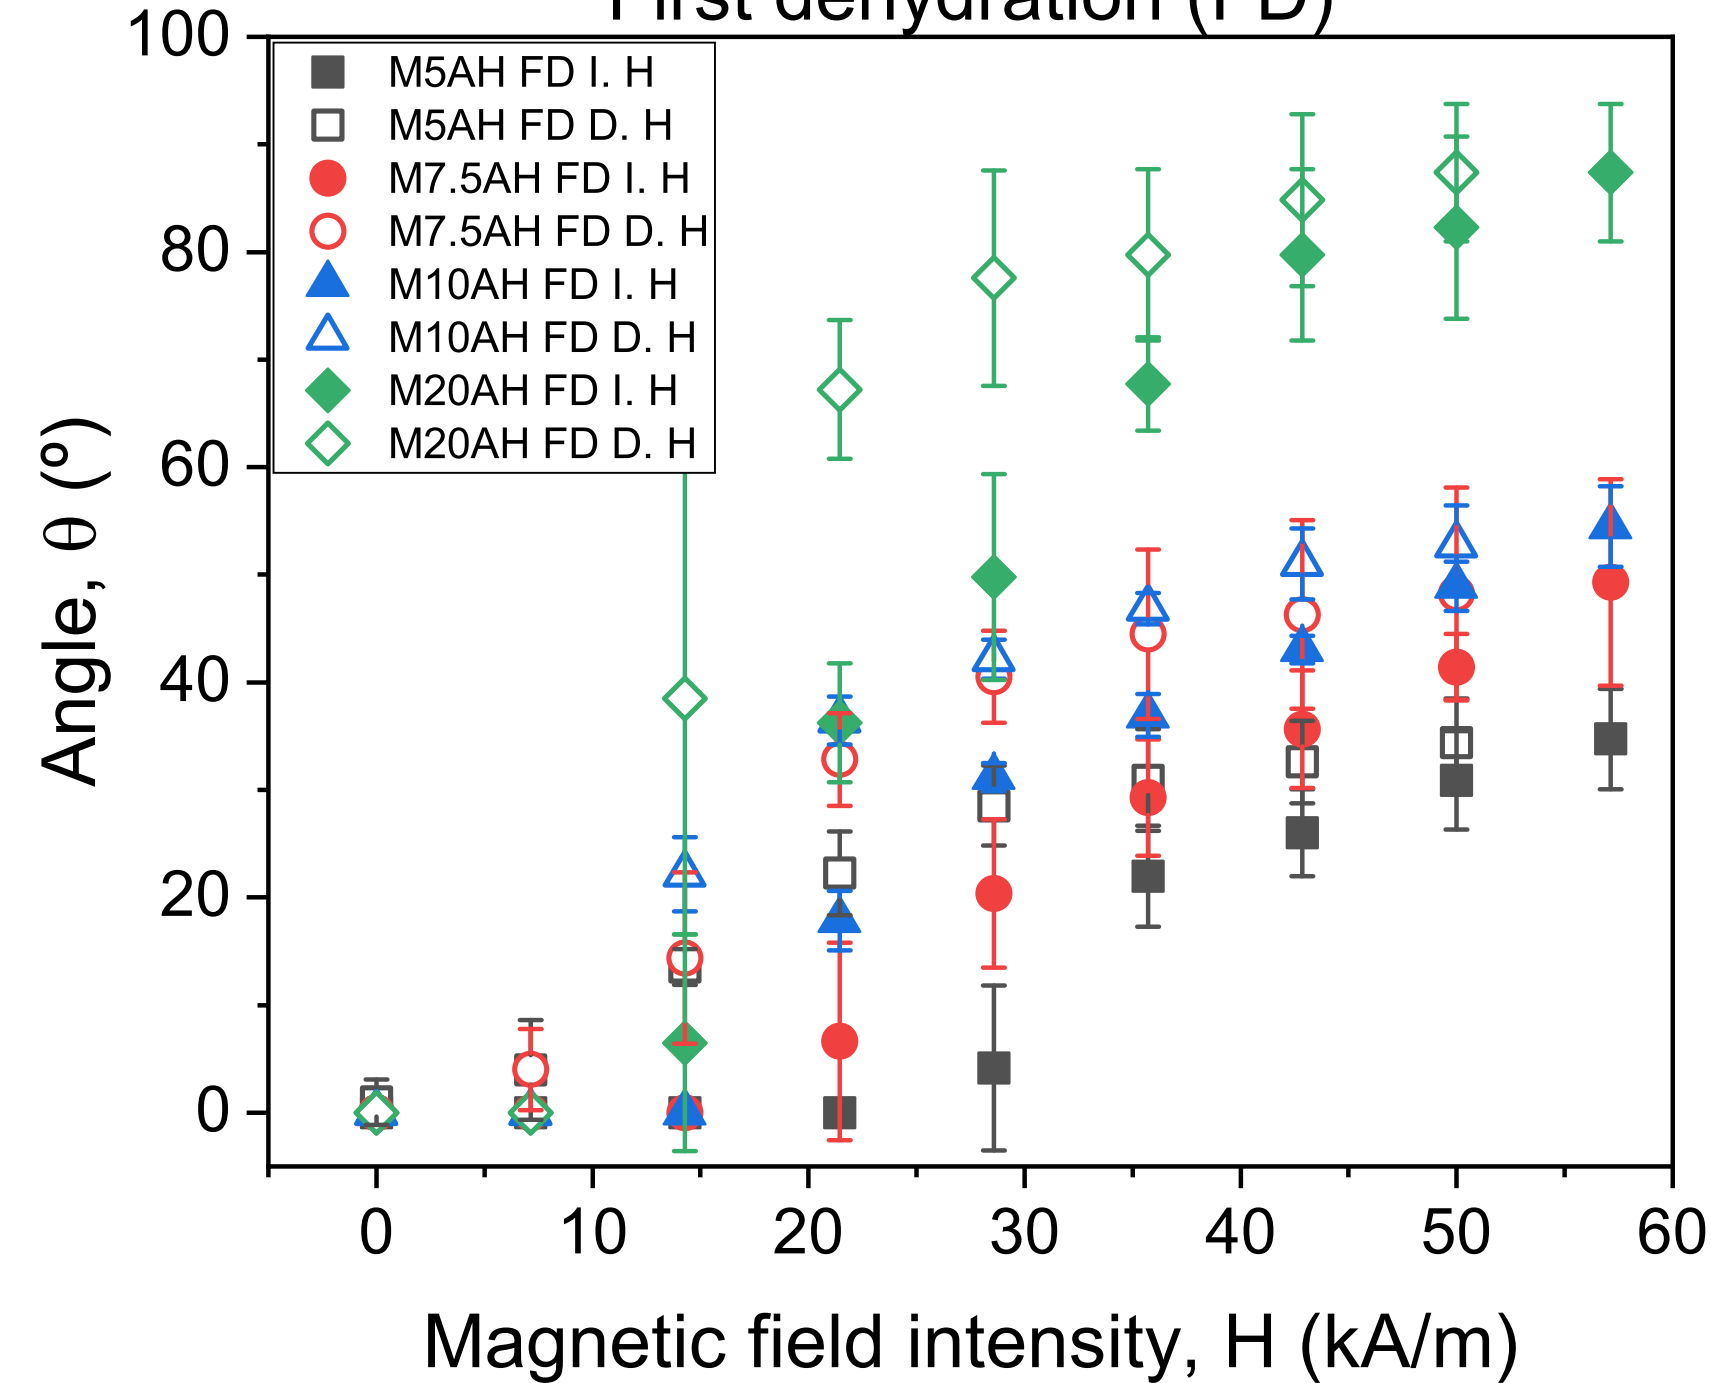

Second dehydration (SD)

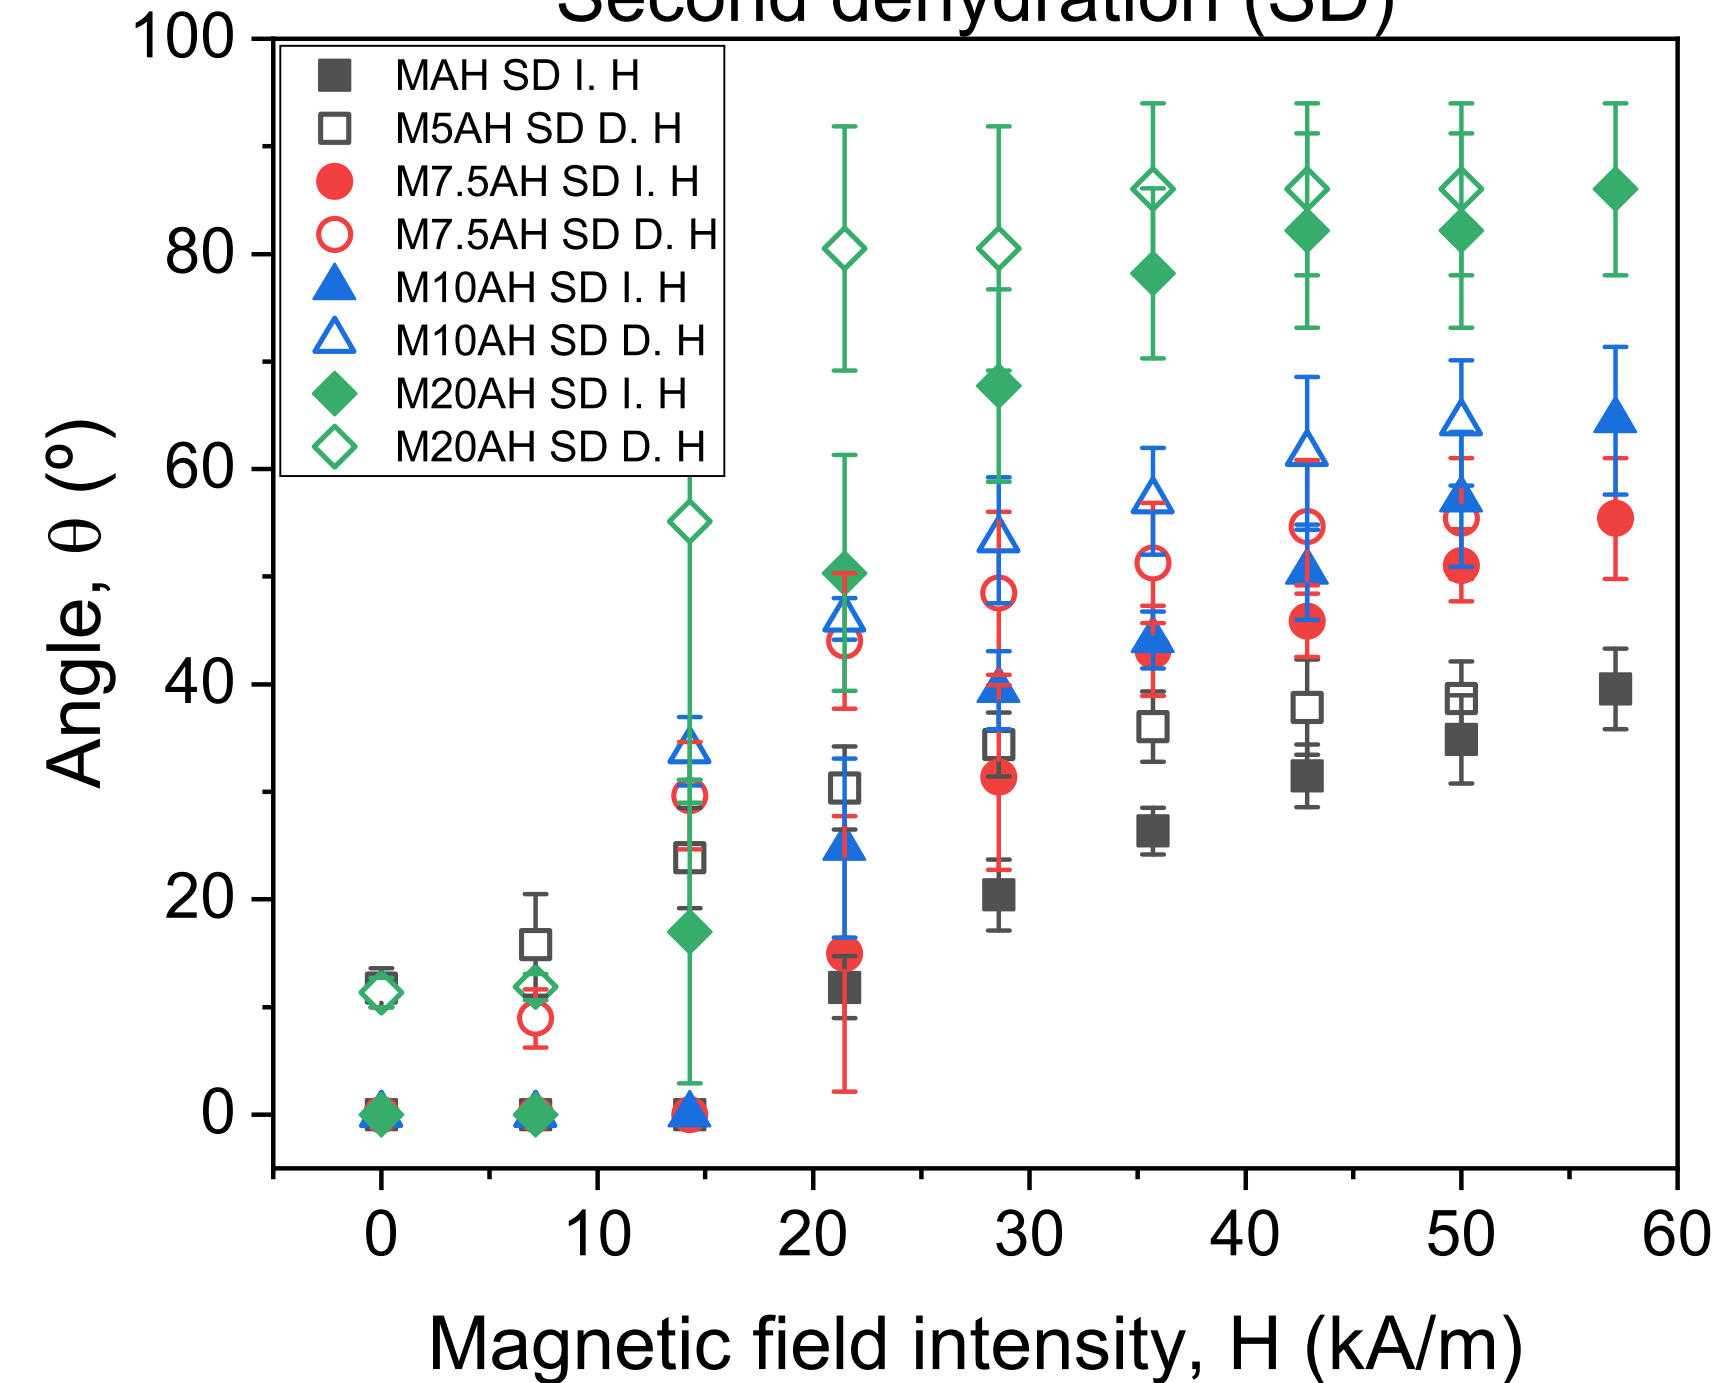

Supplement: s1 [file s1]

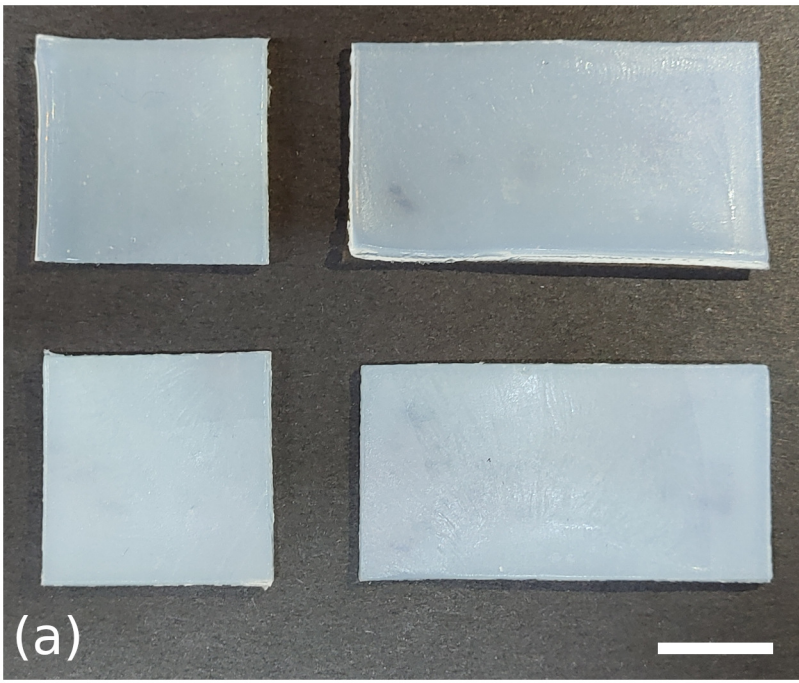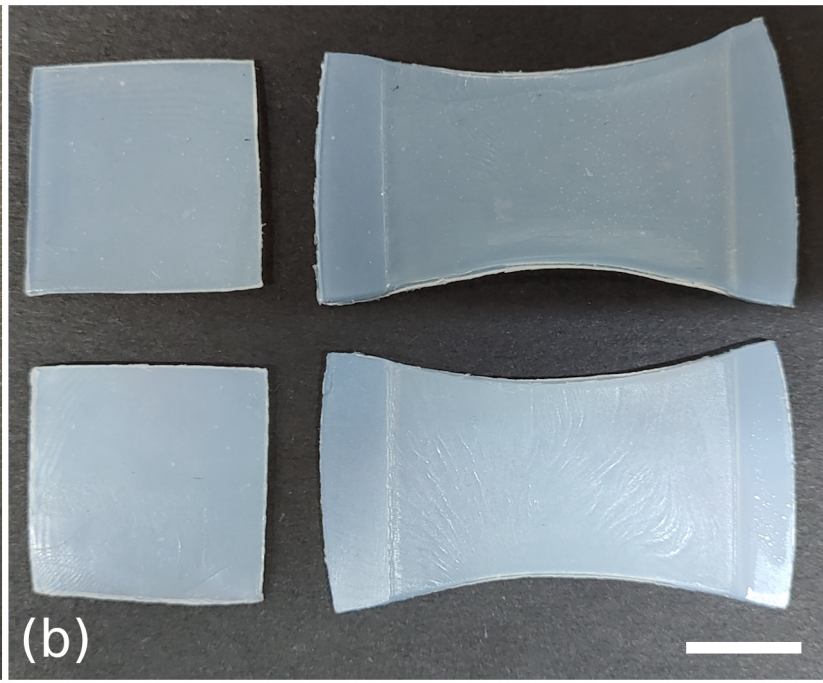

Supplement: s1 [file s1]

(a)

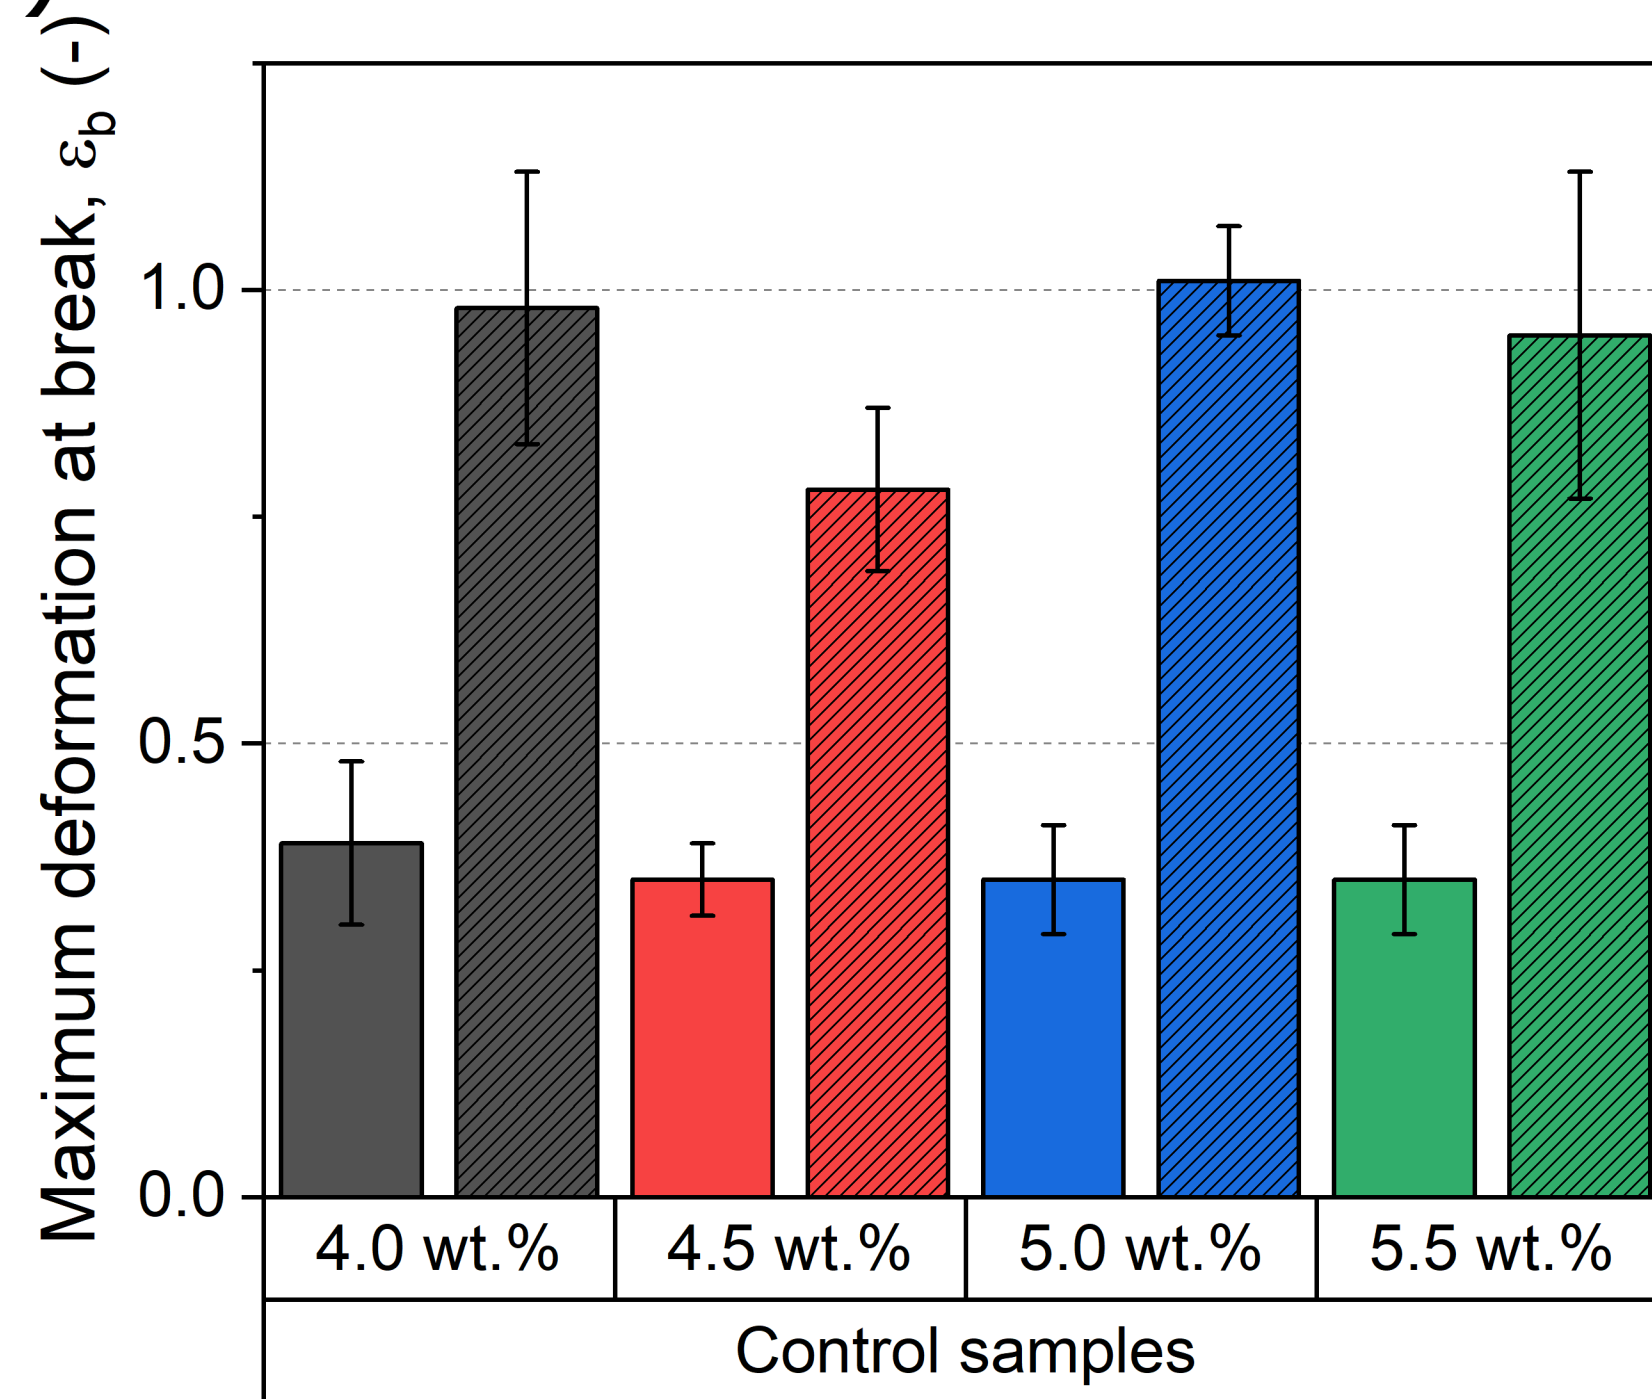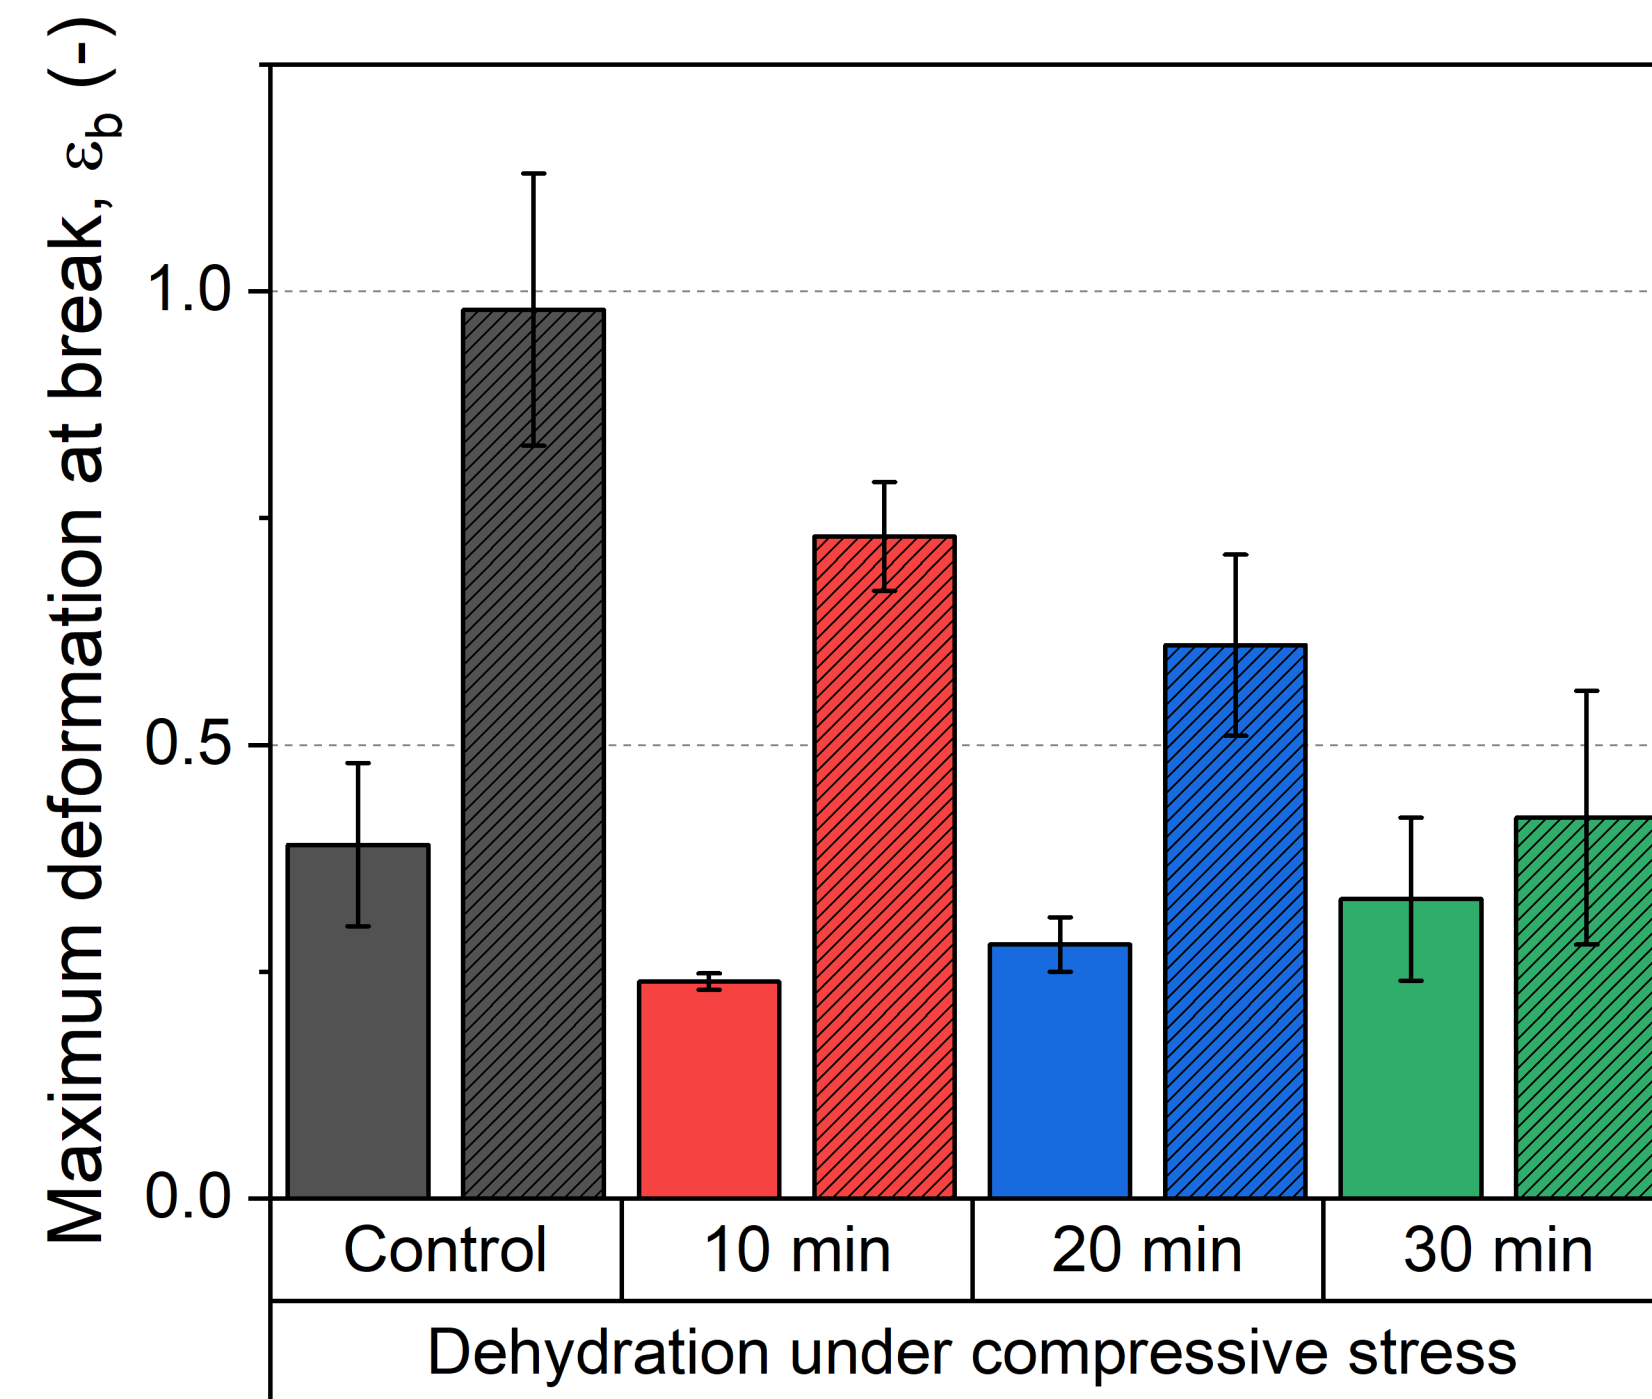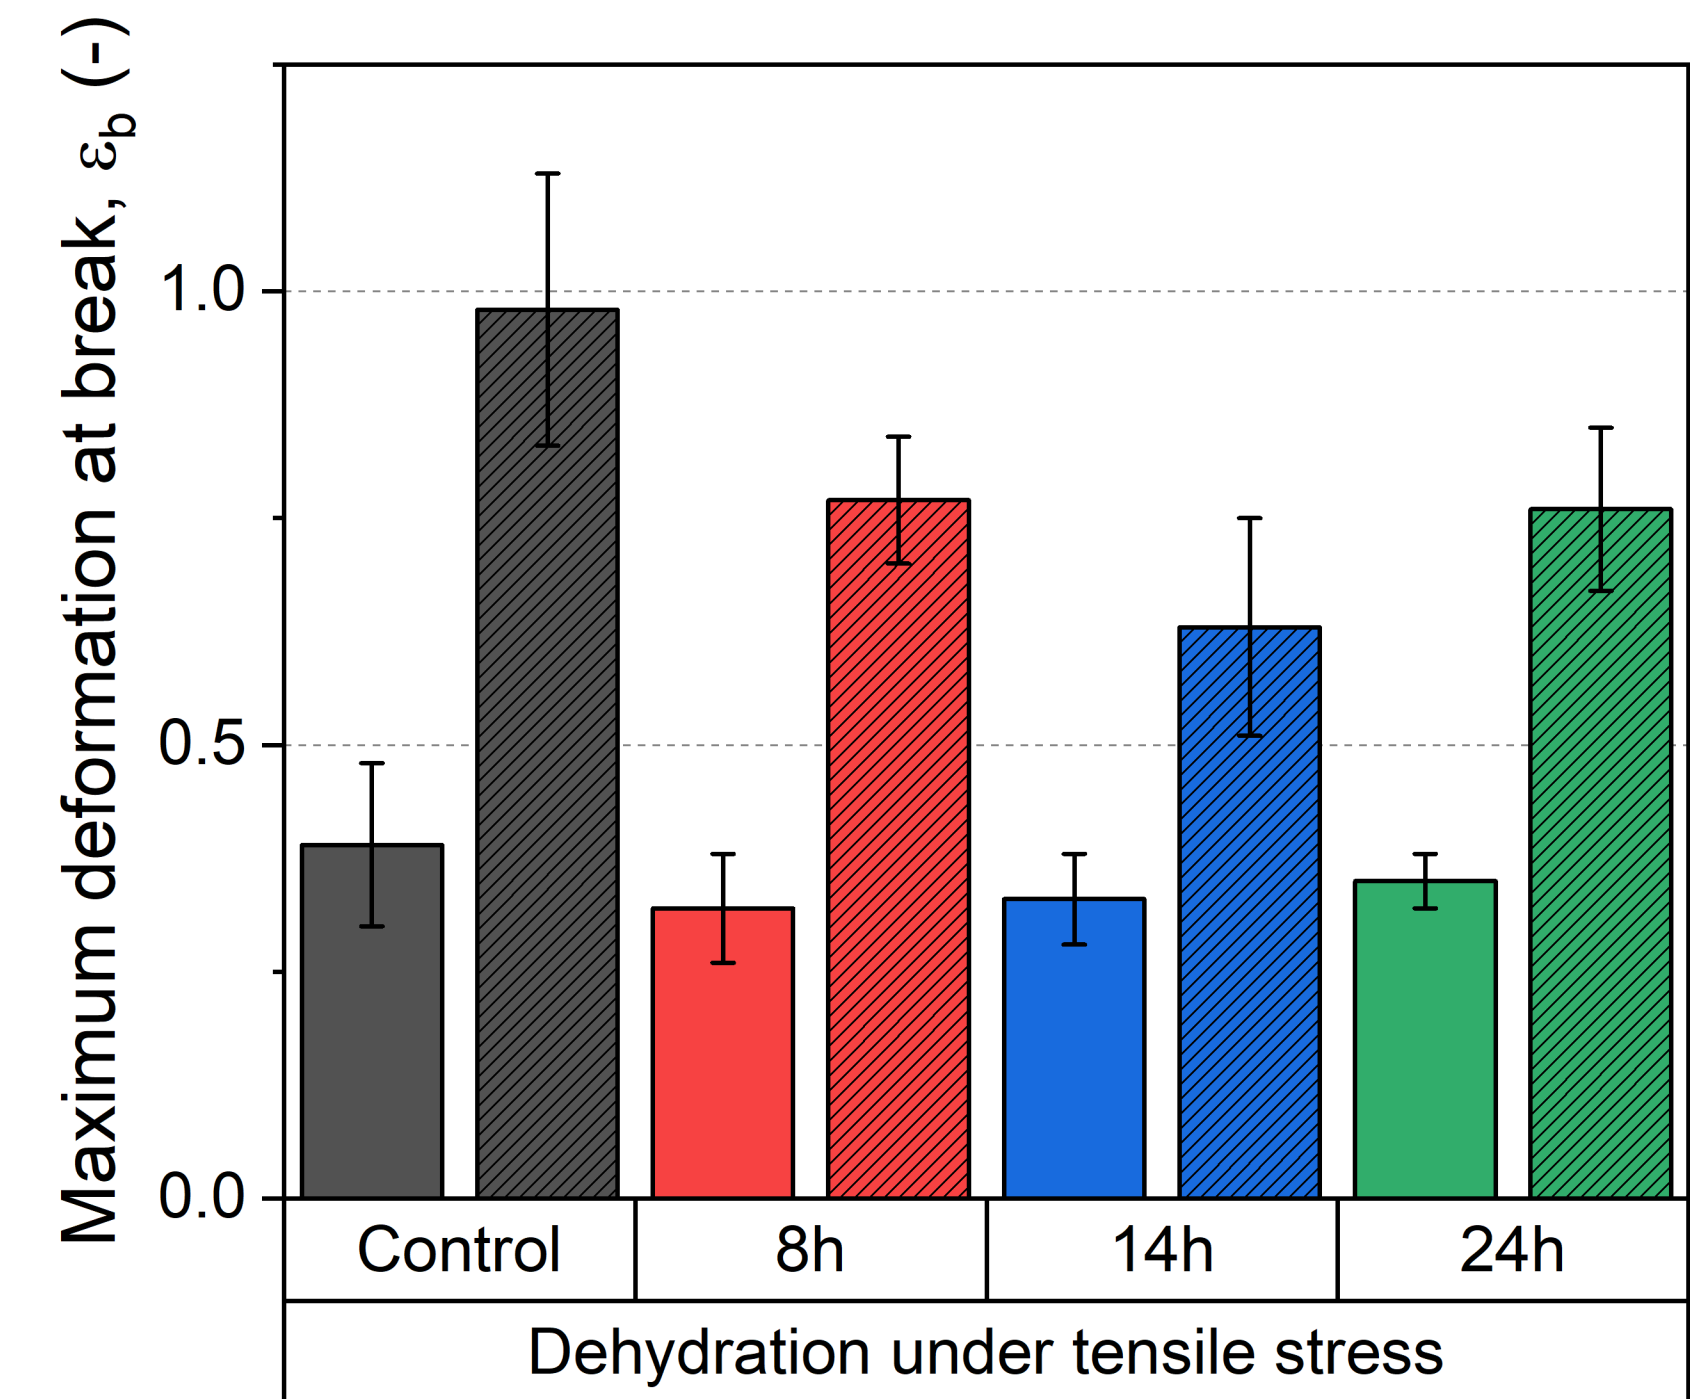

(b)

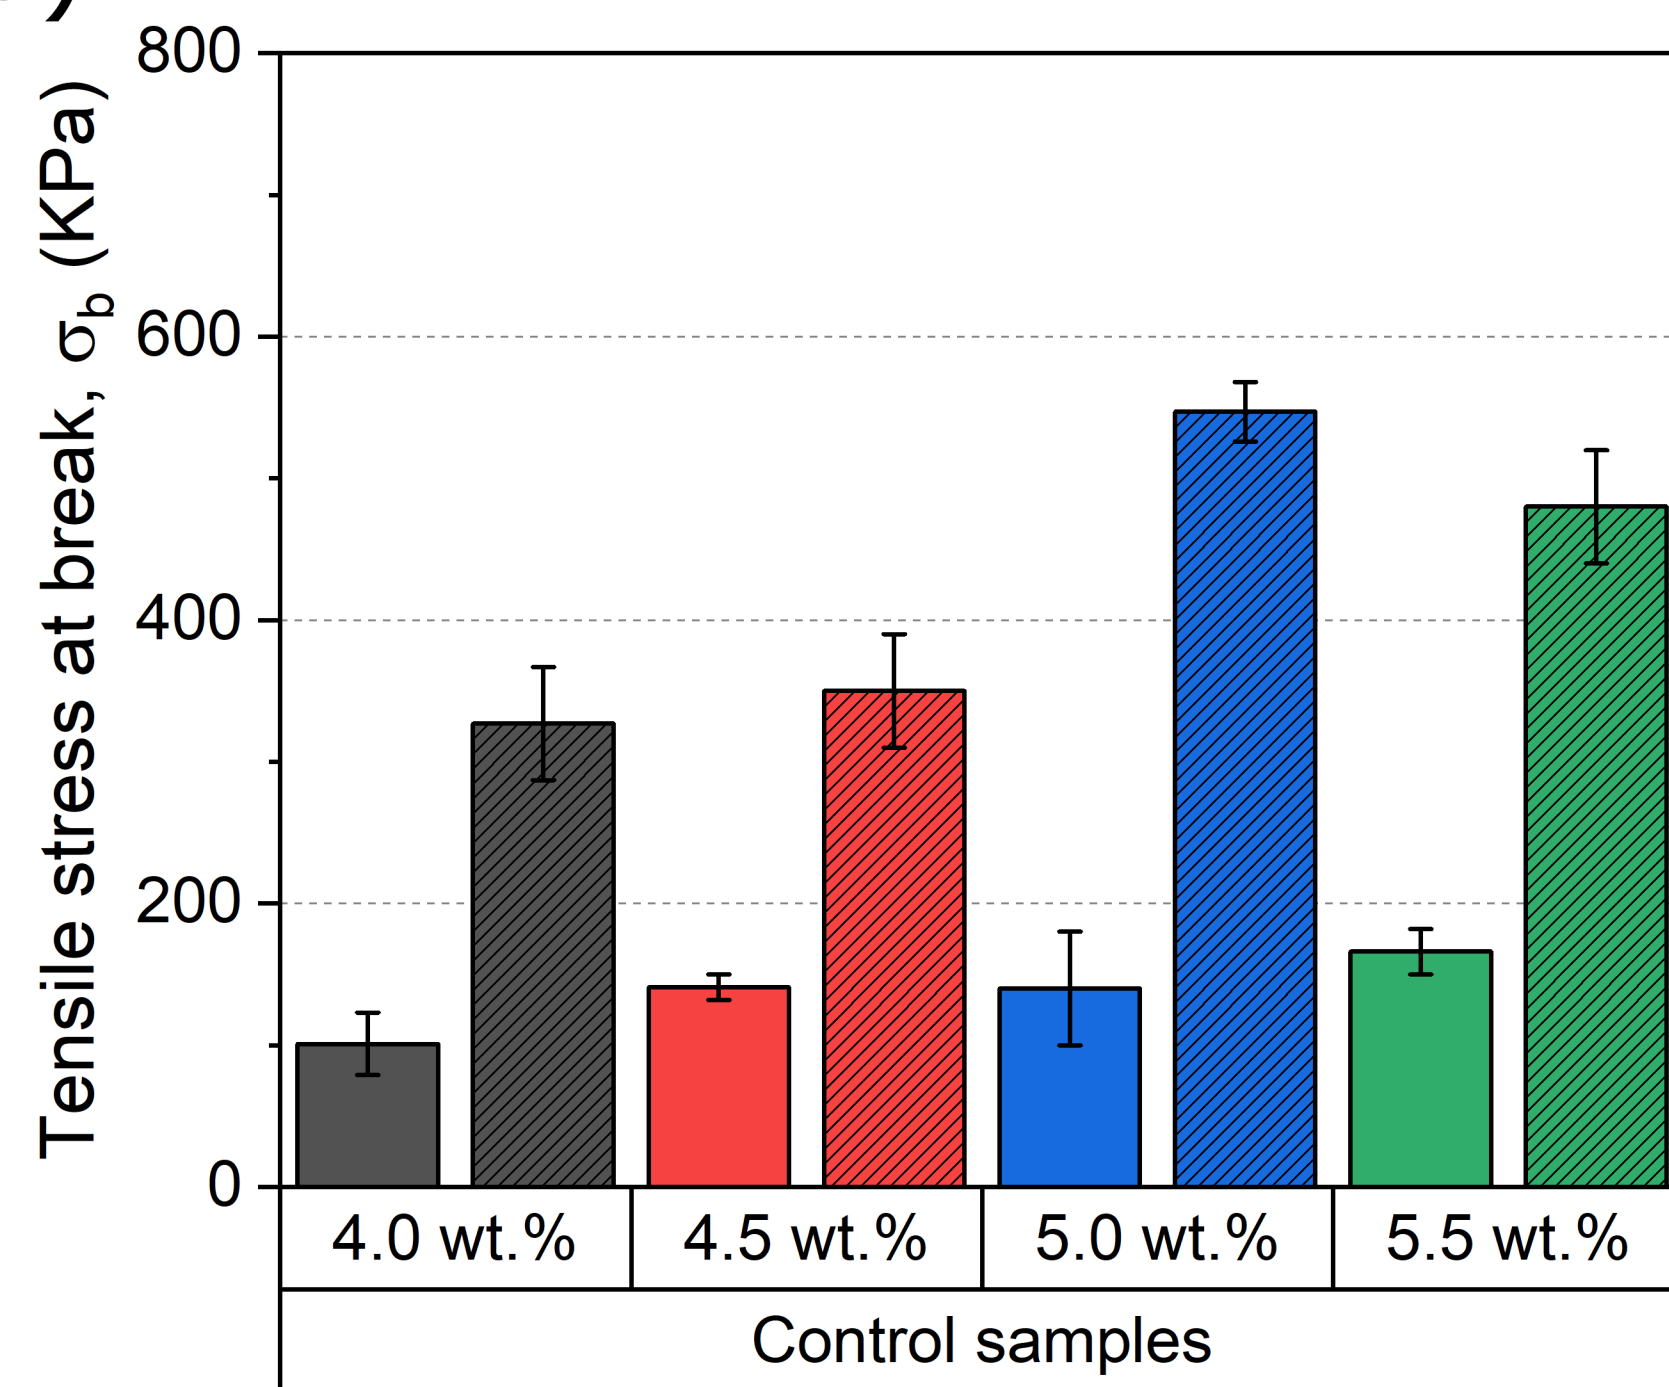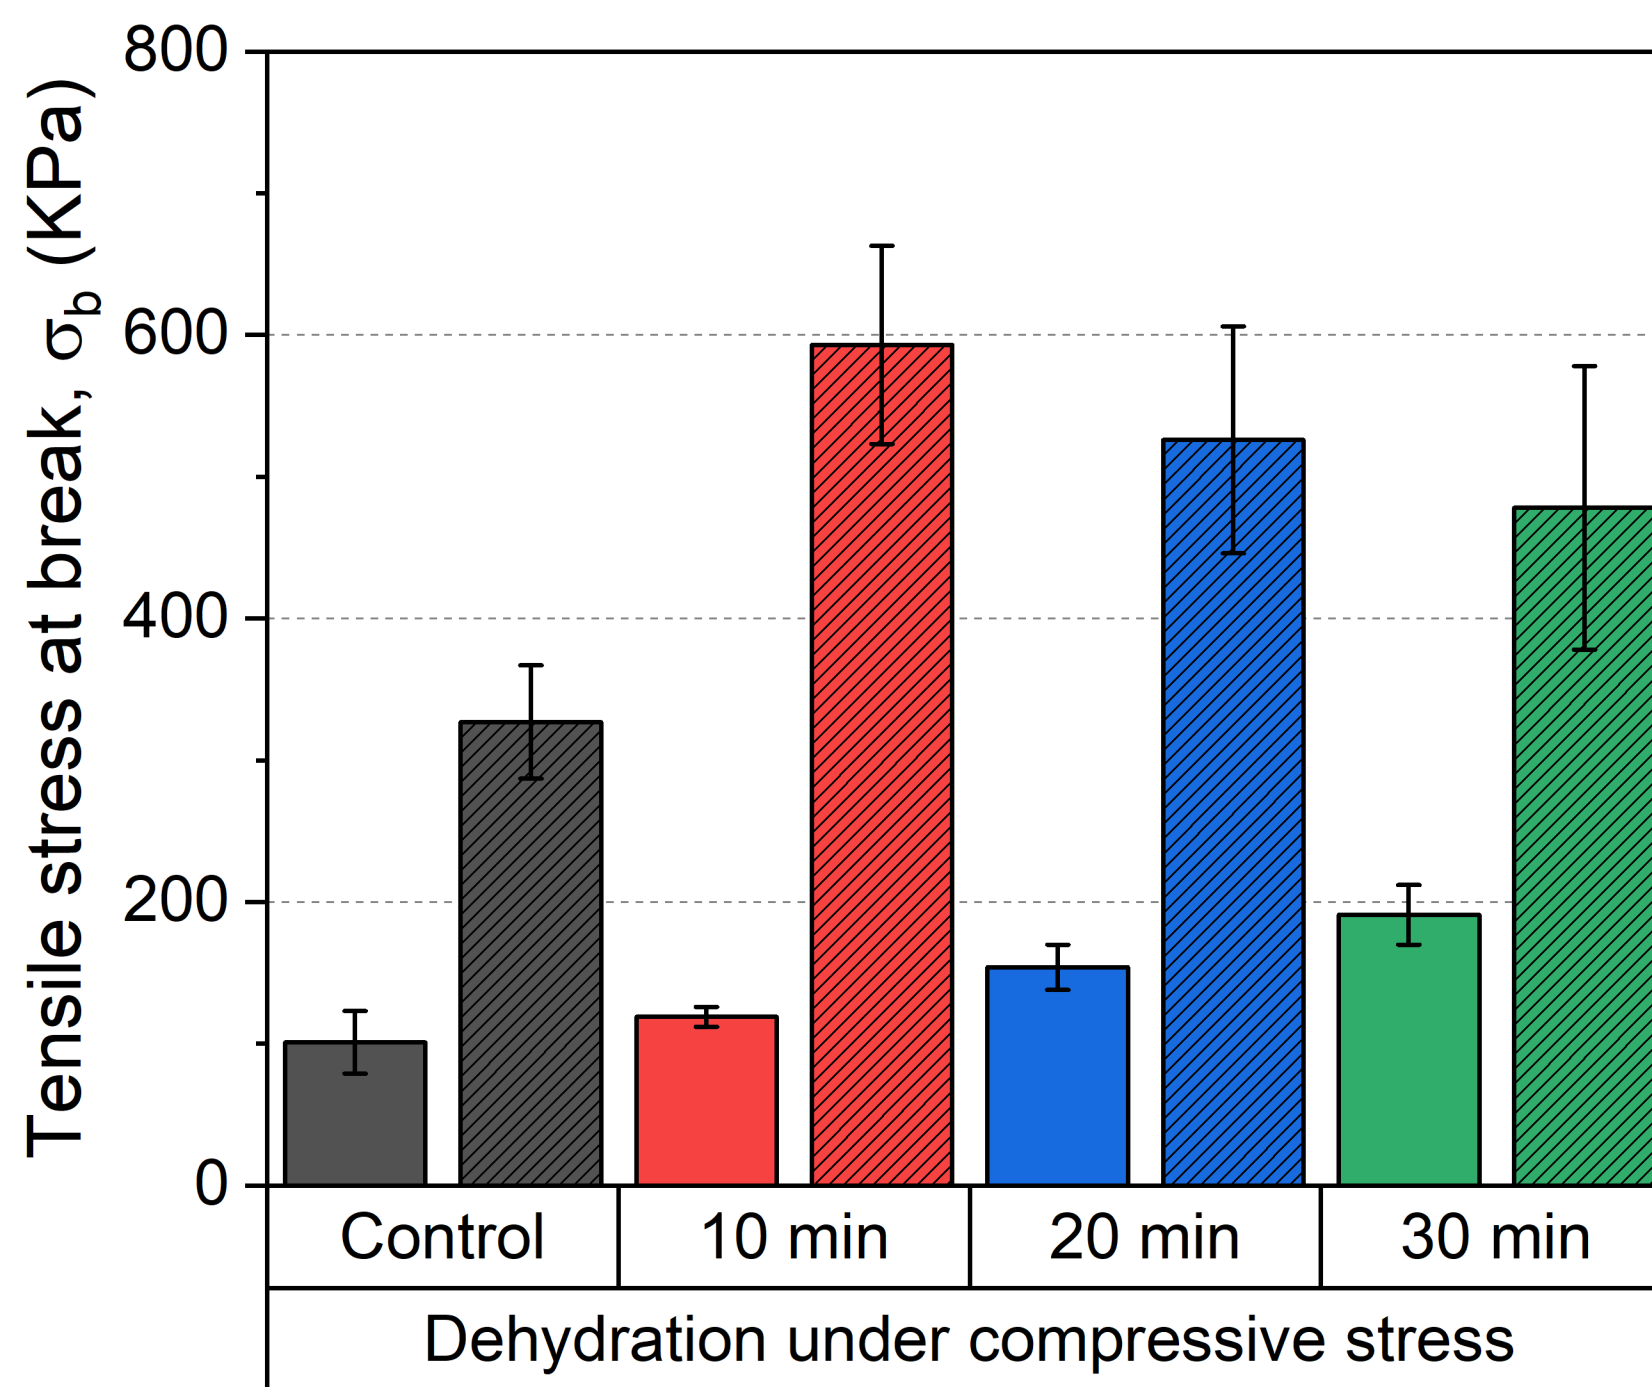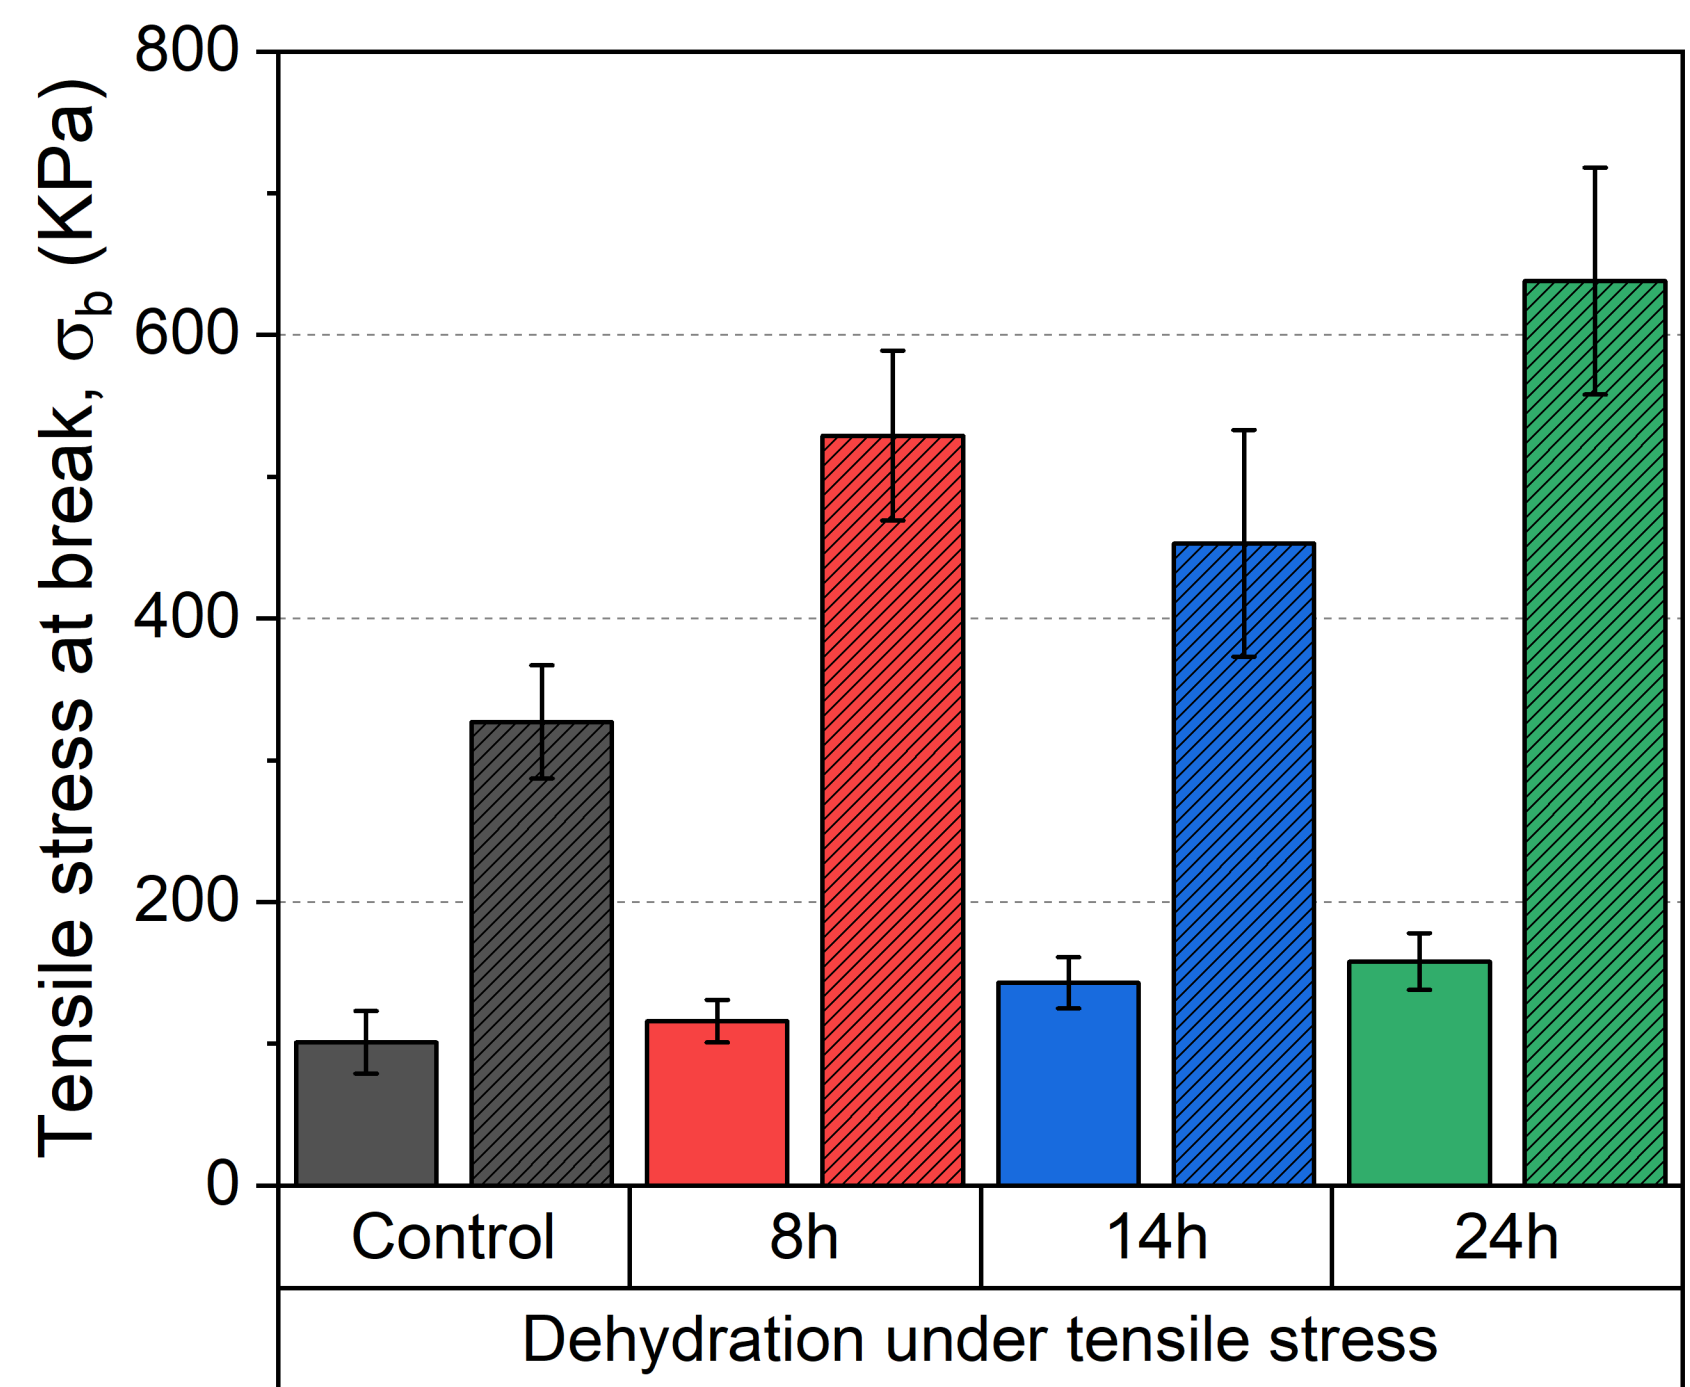

Supplement: s1 [file s1]

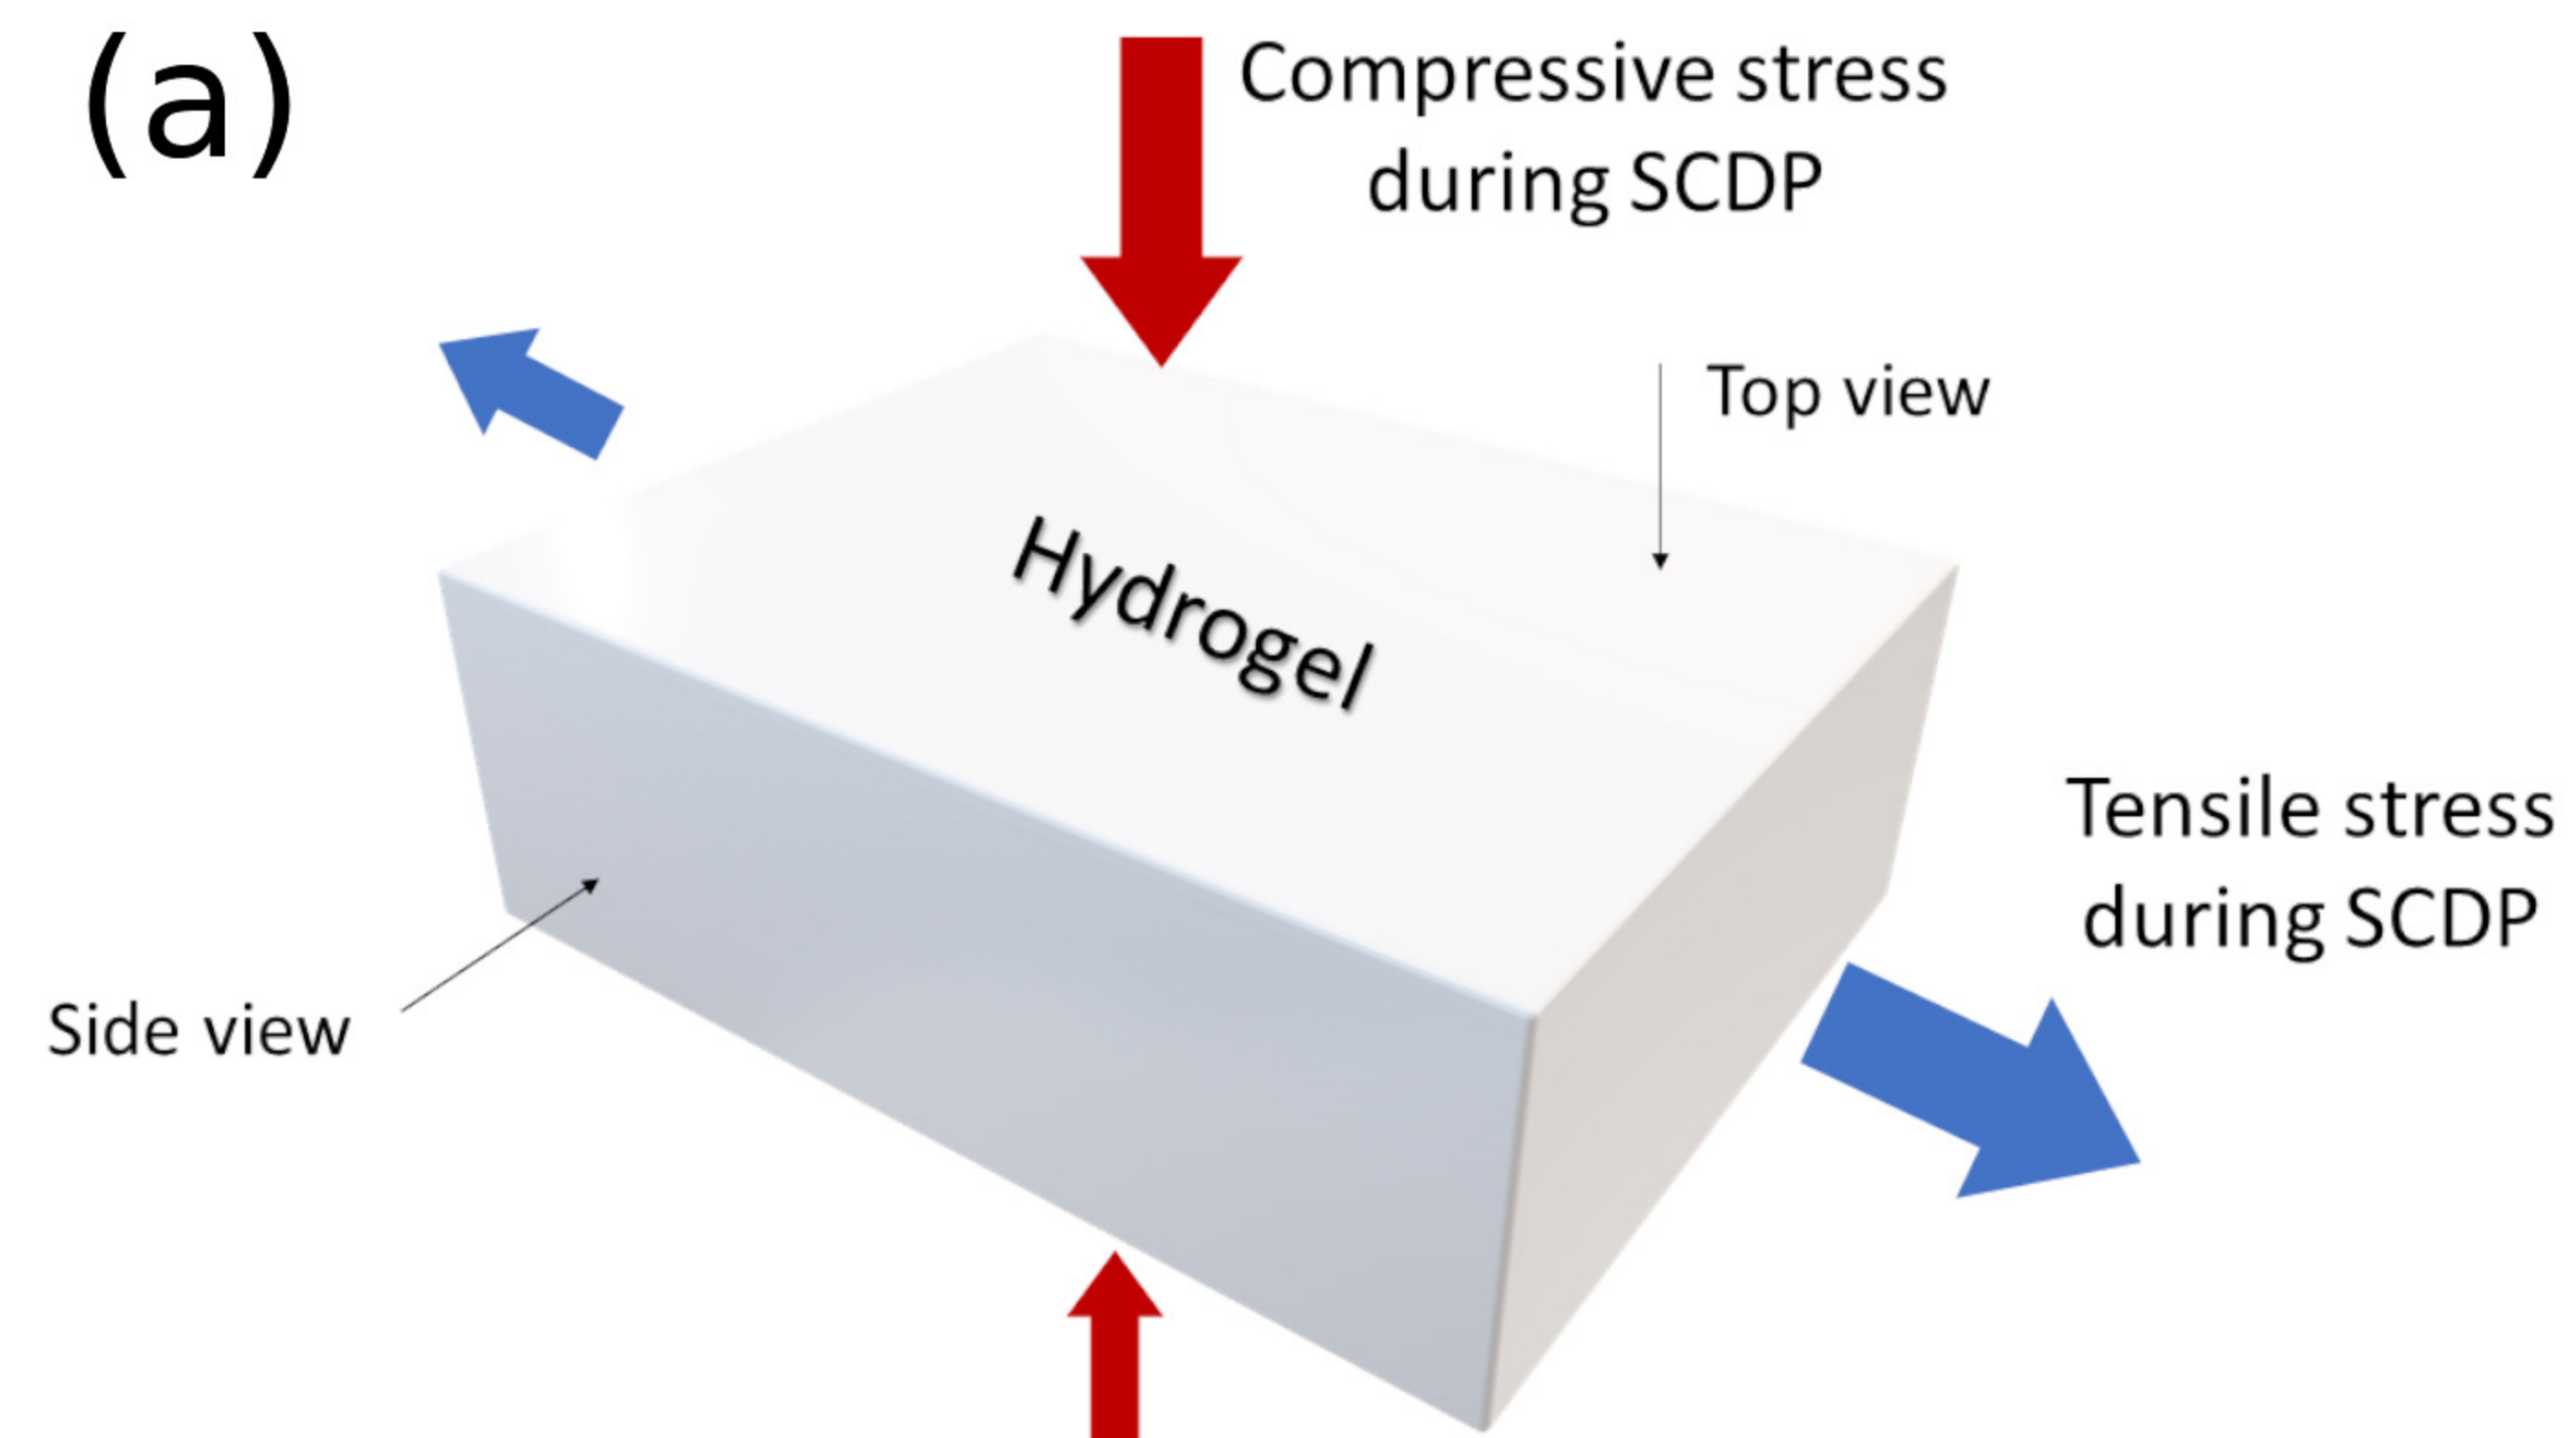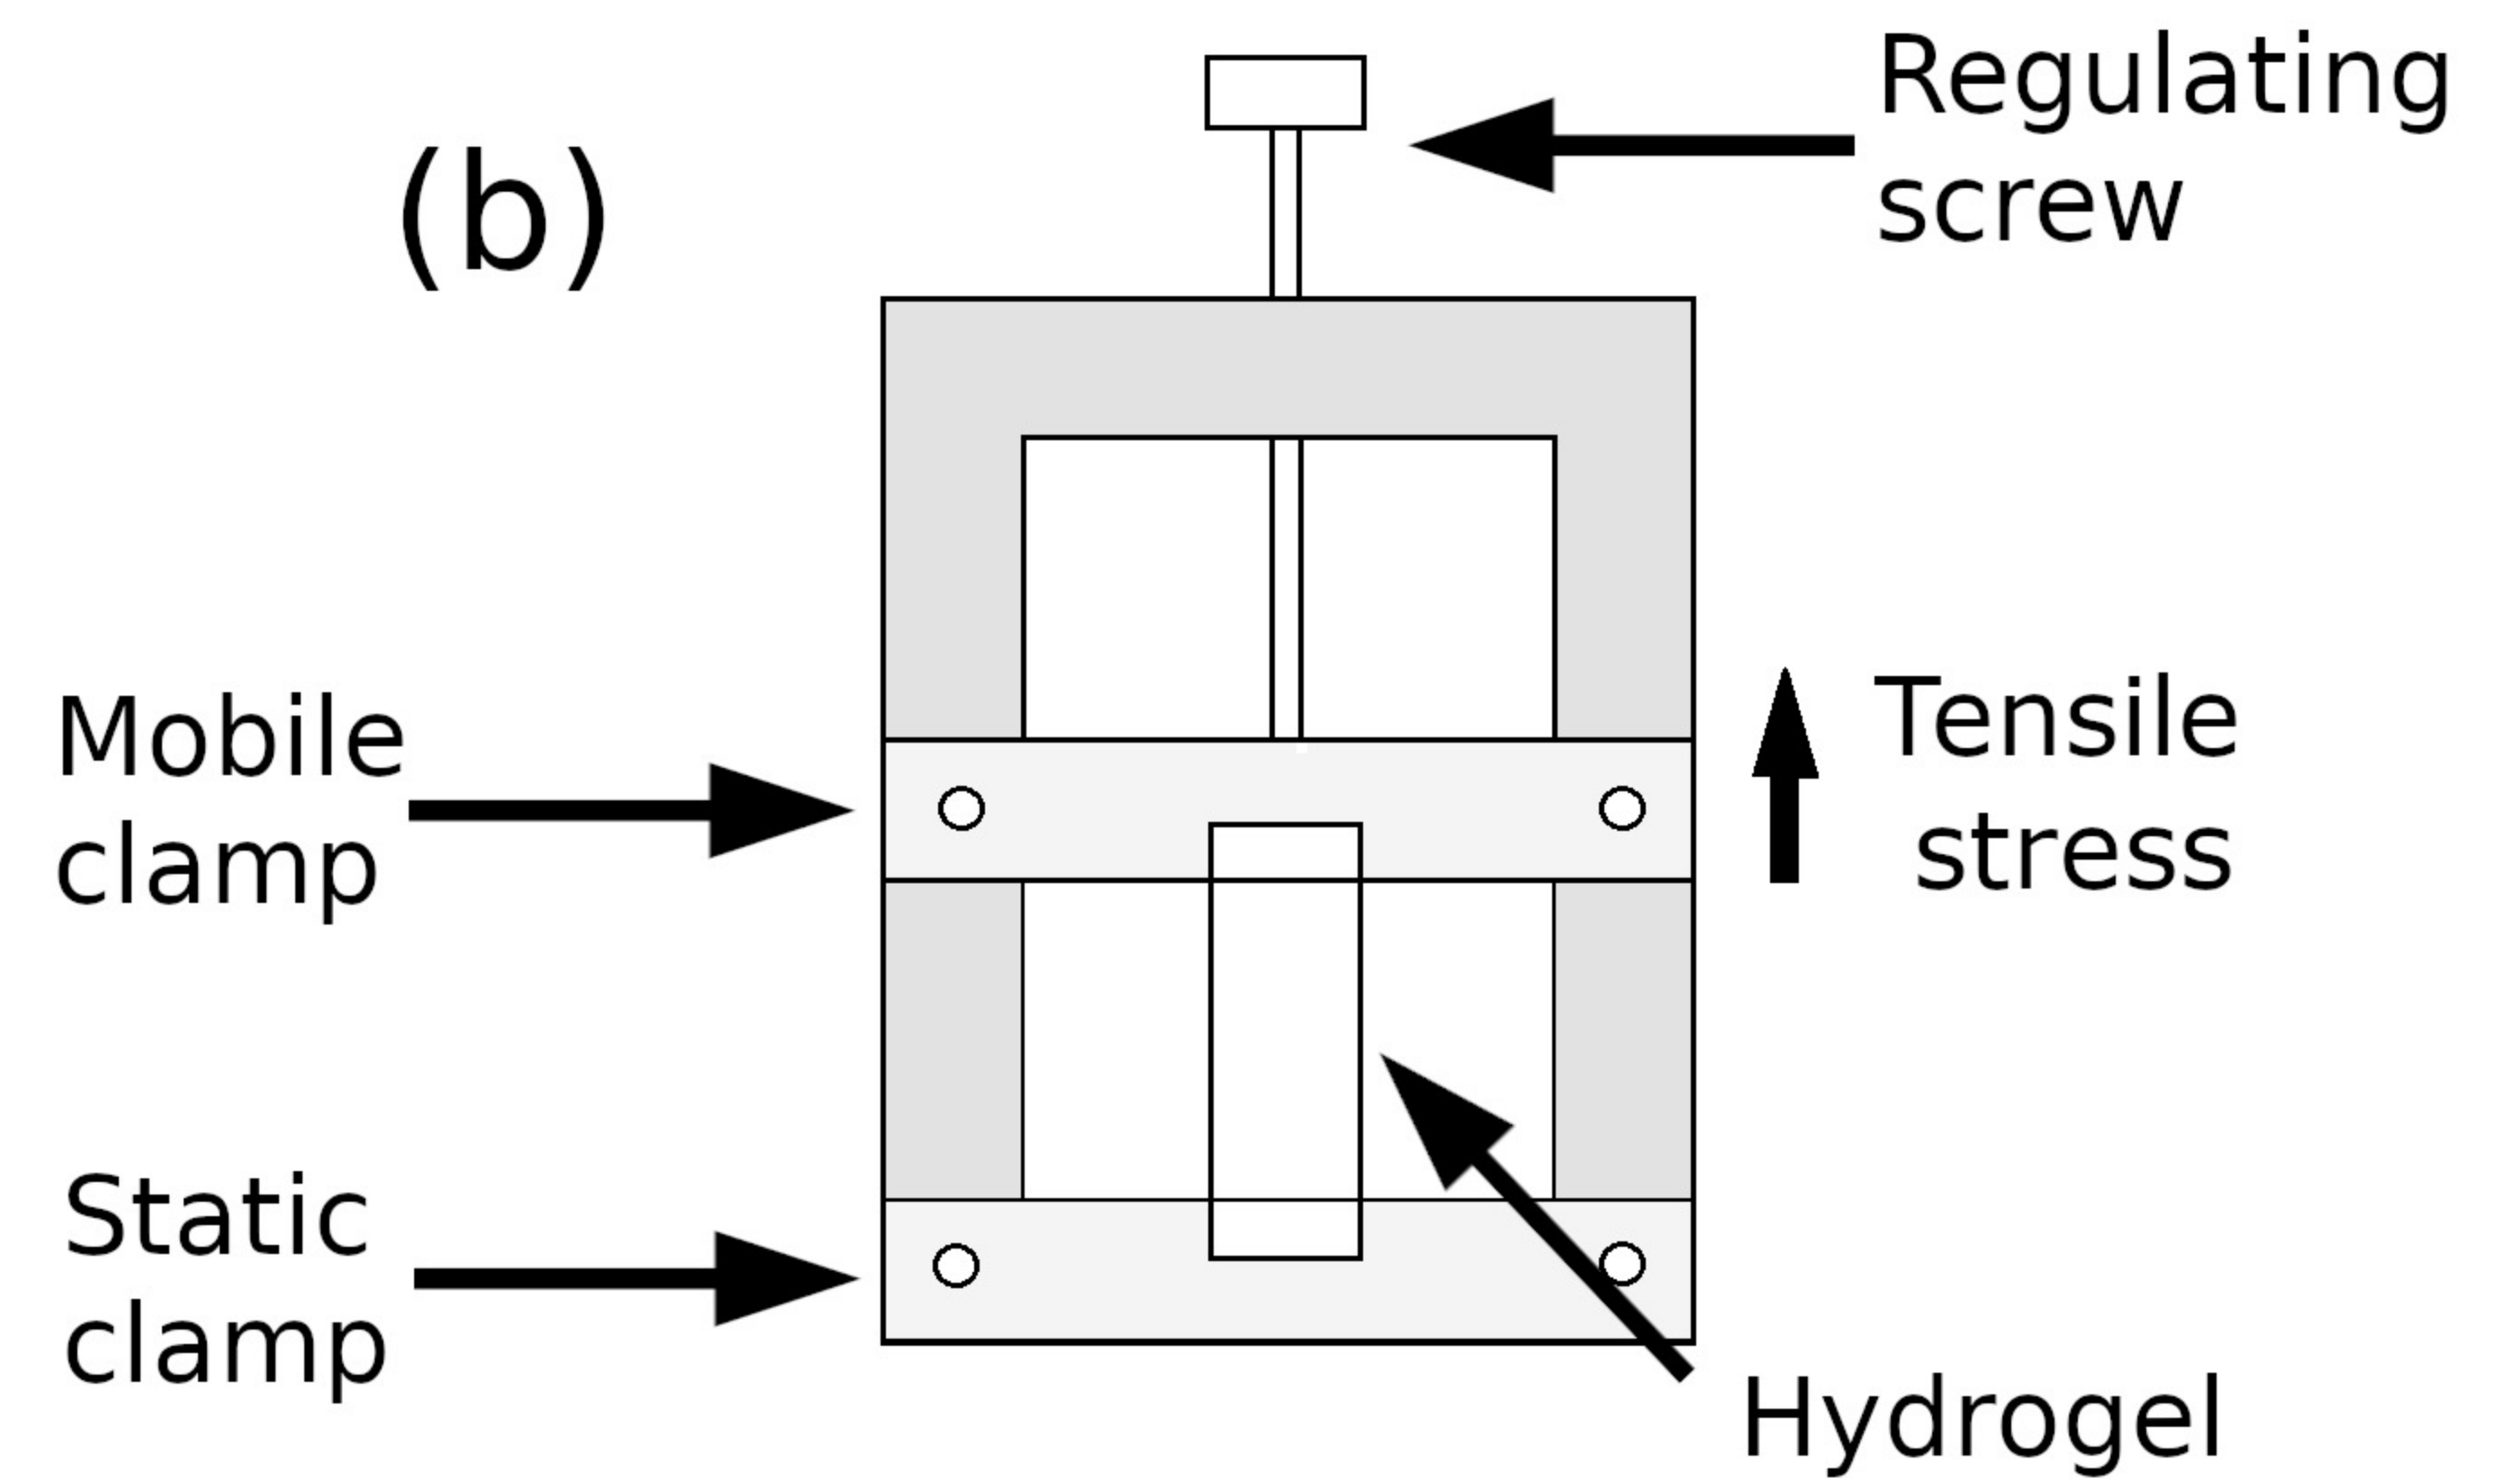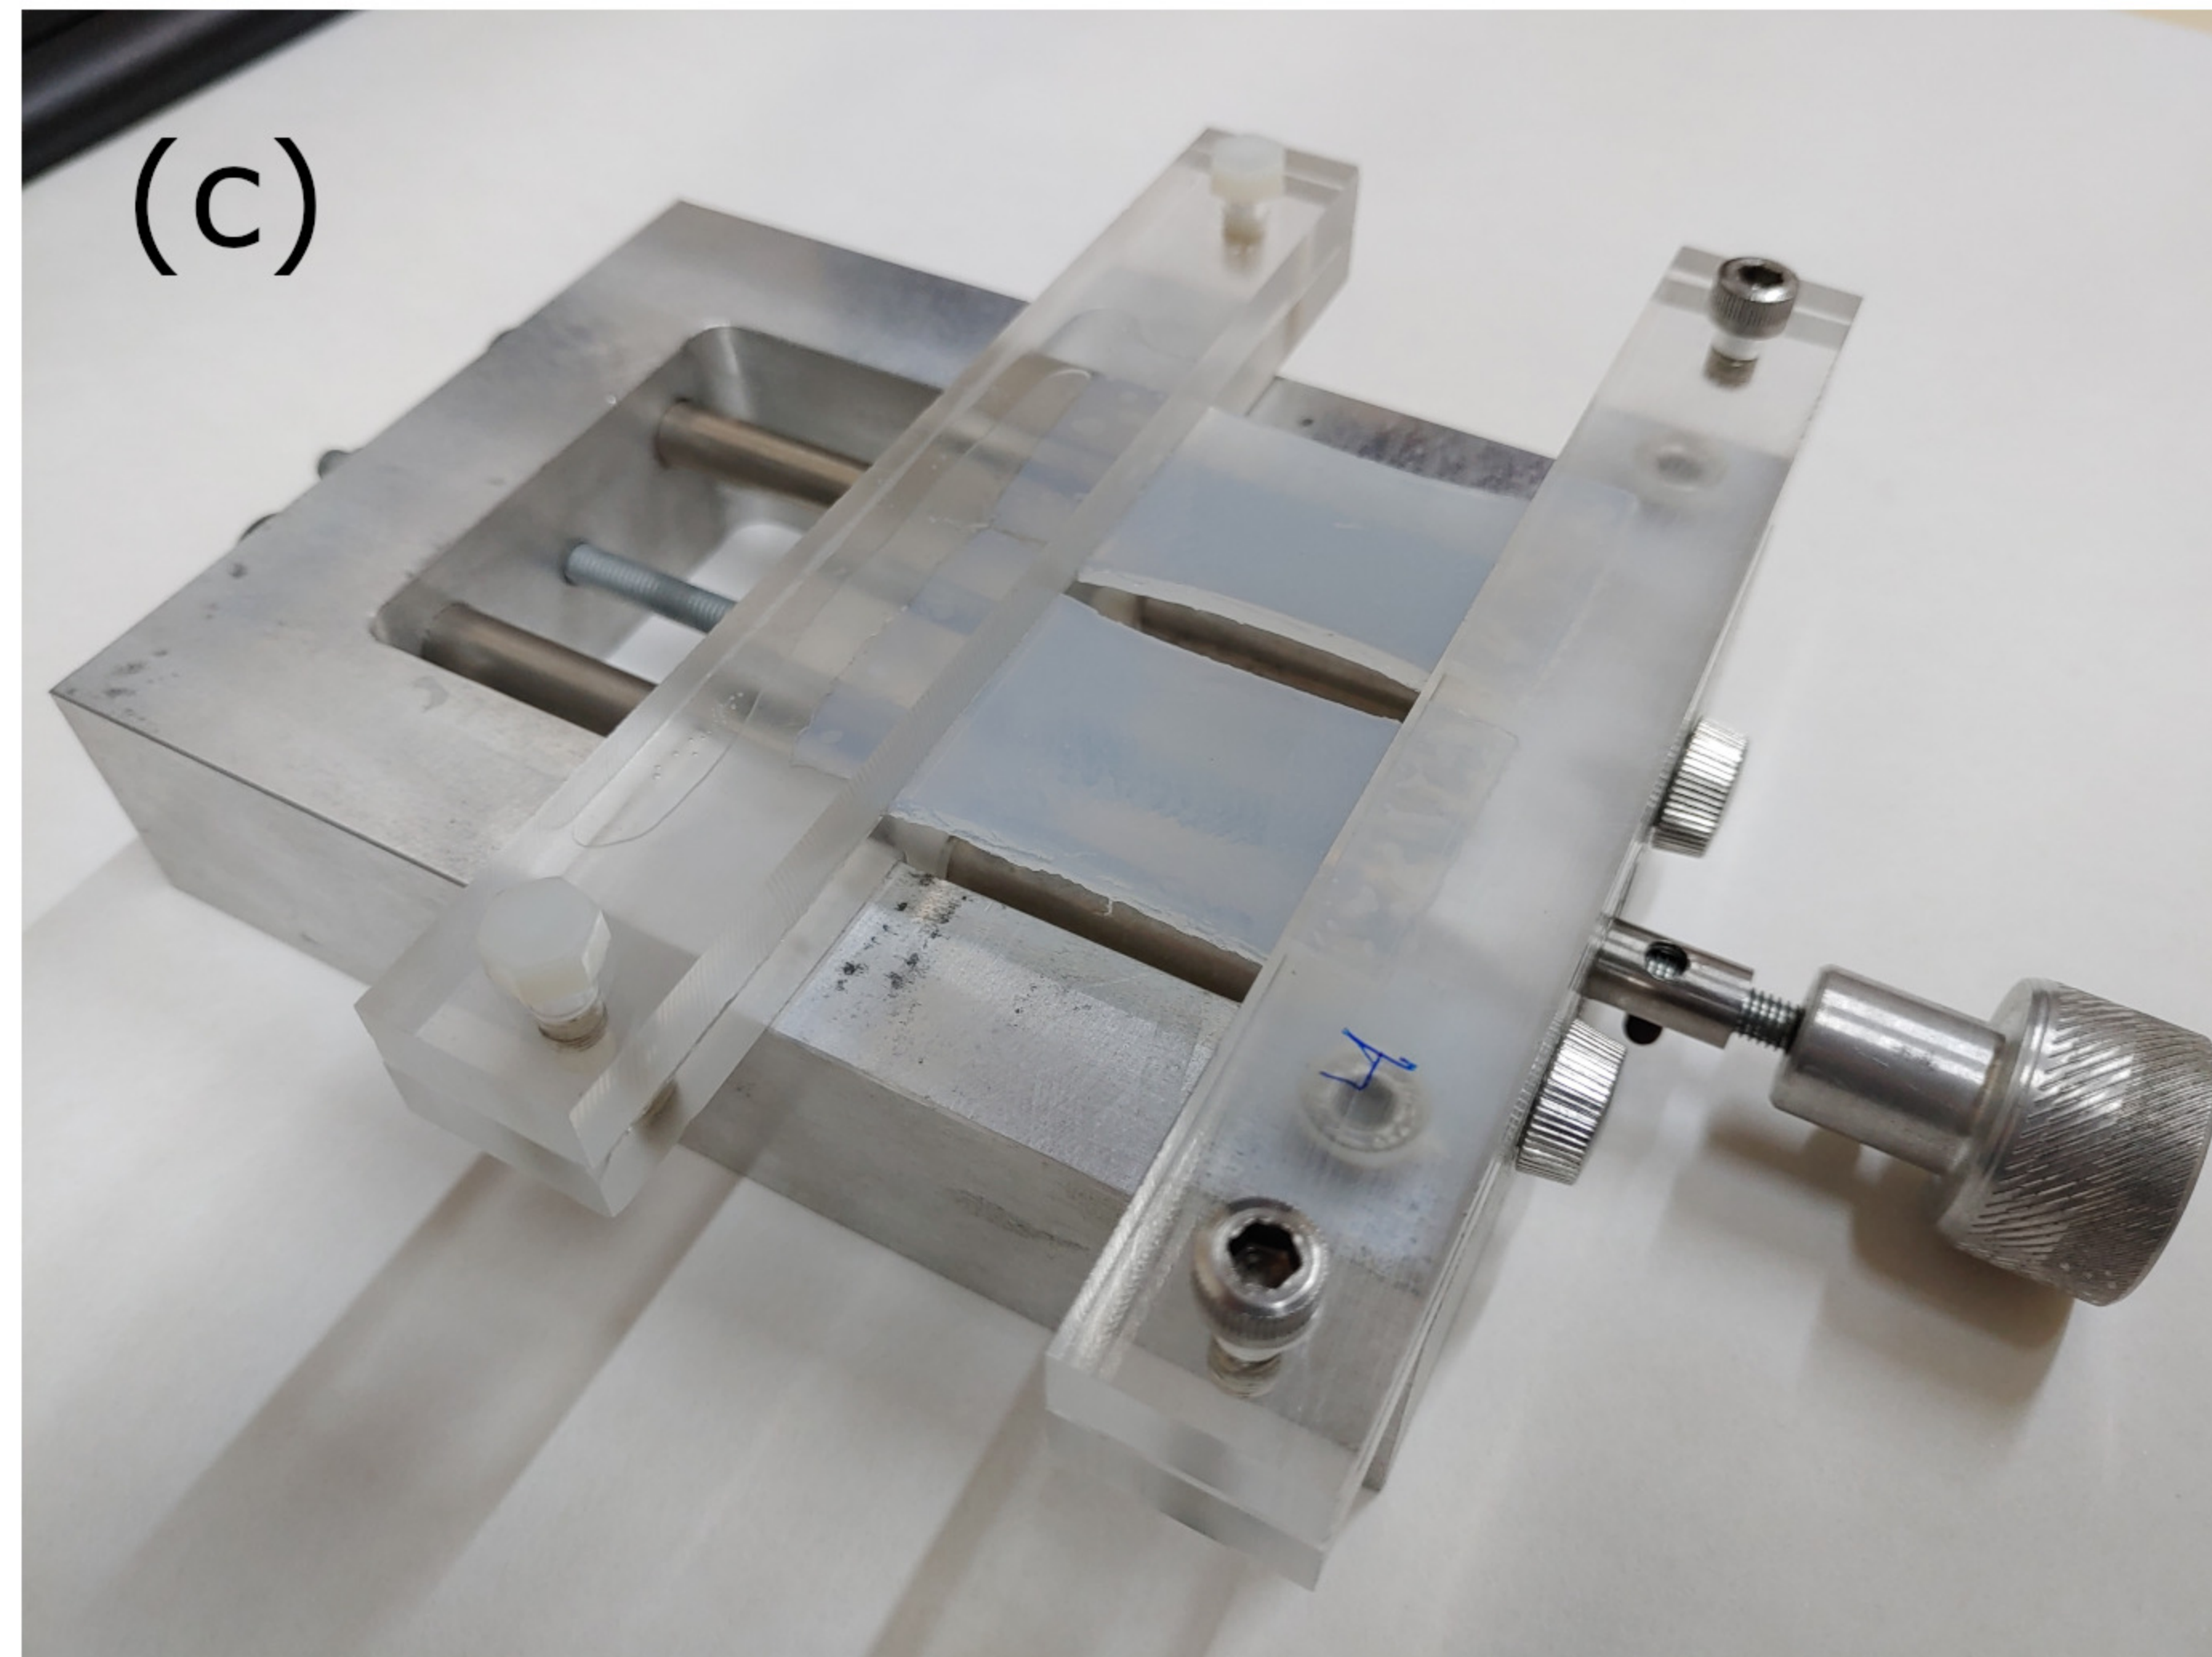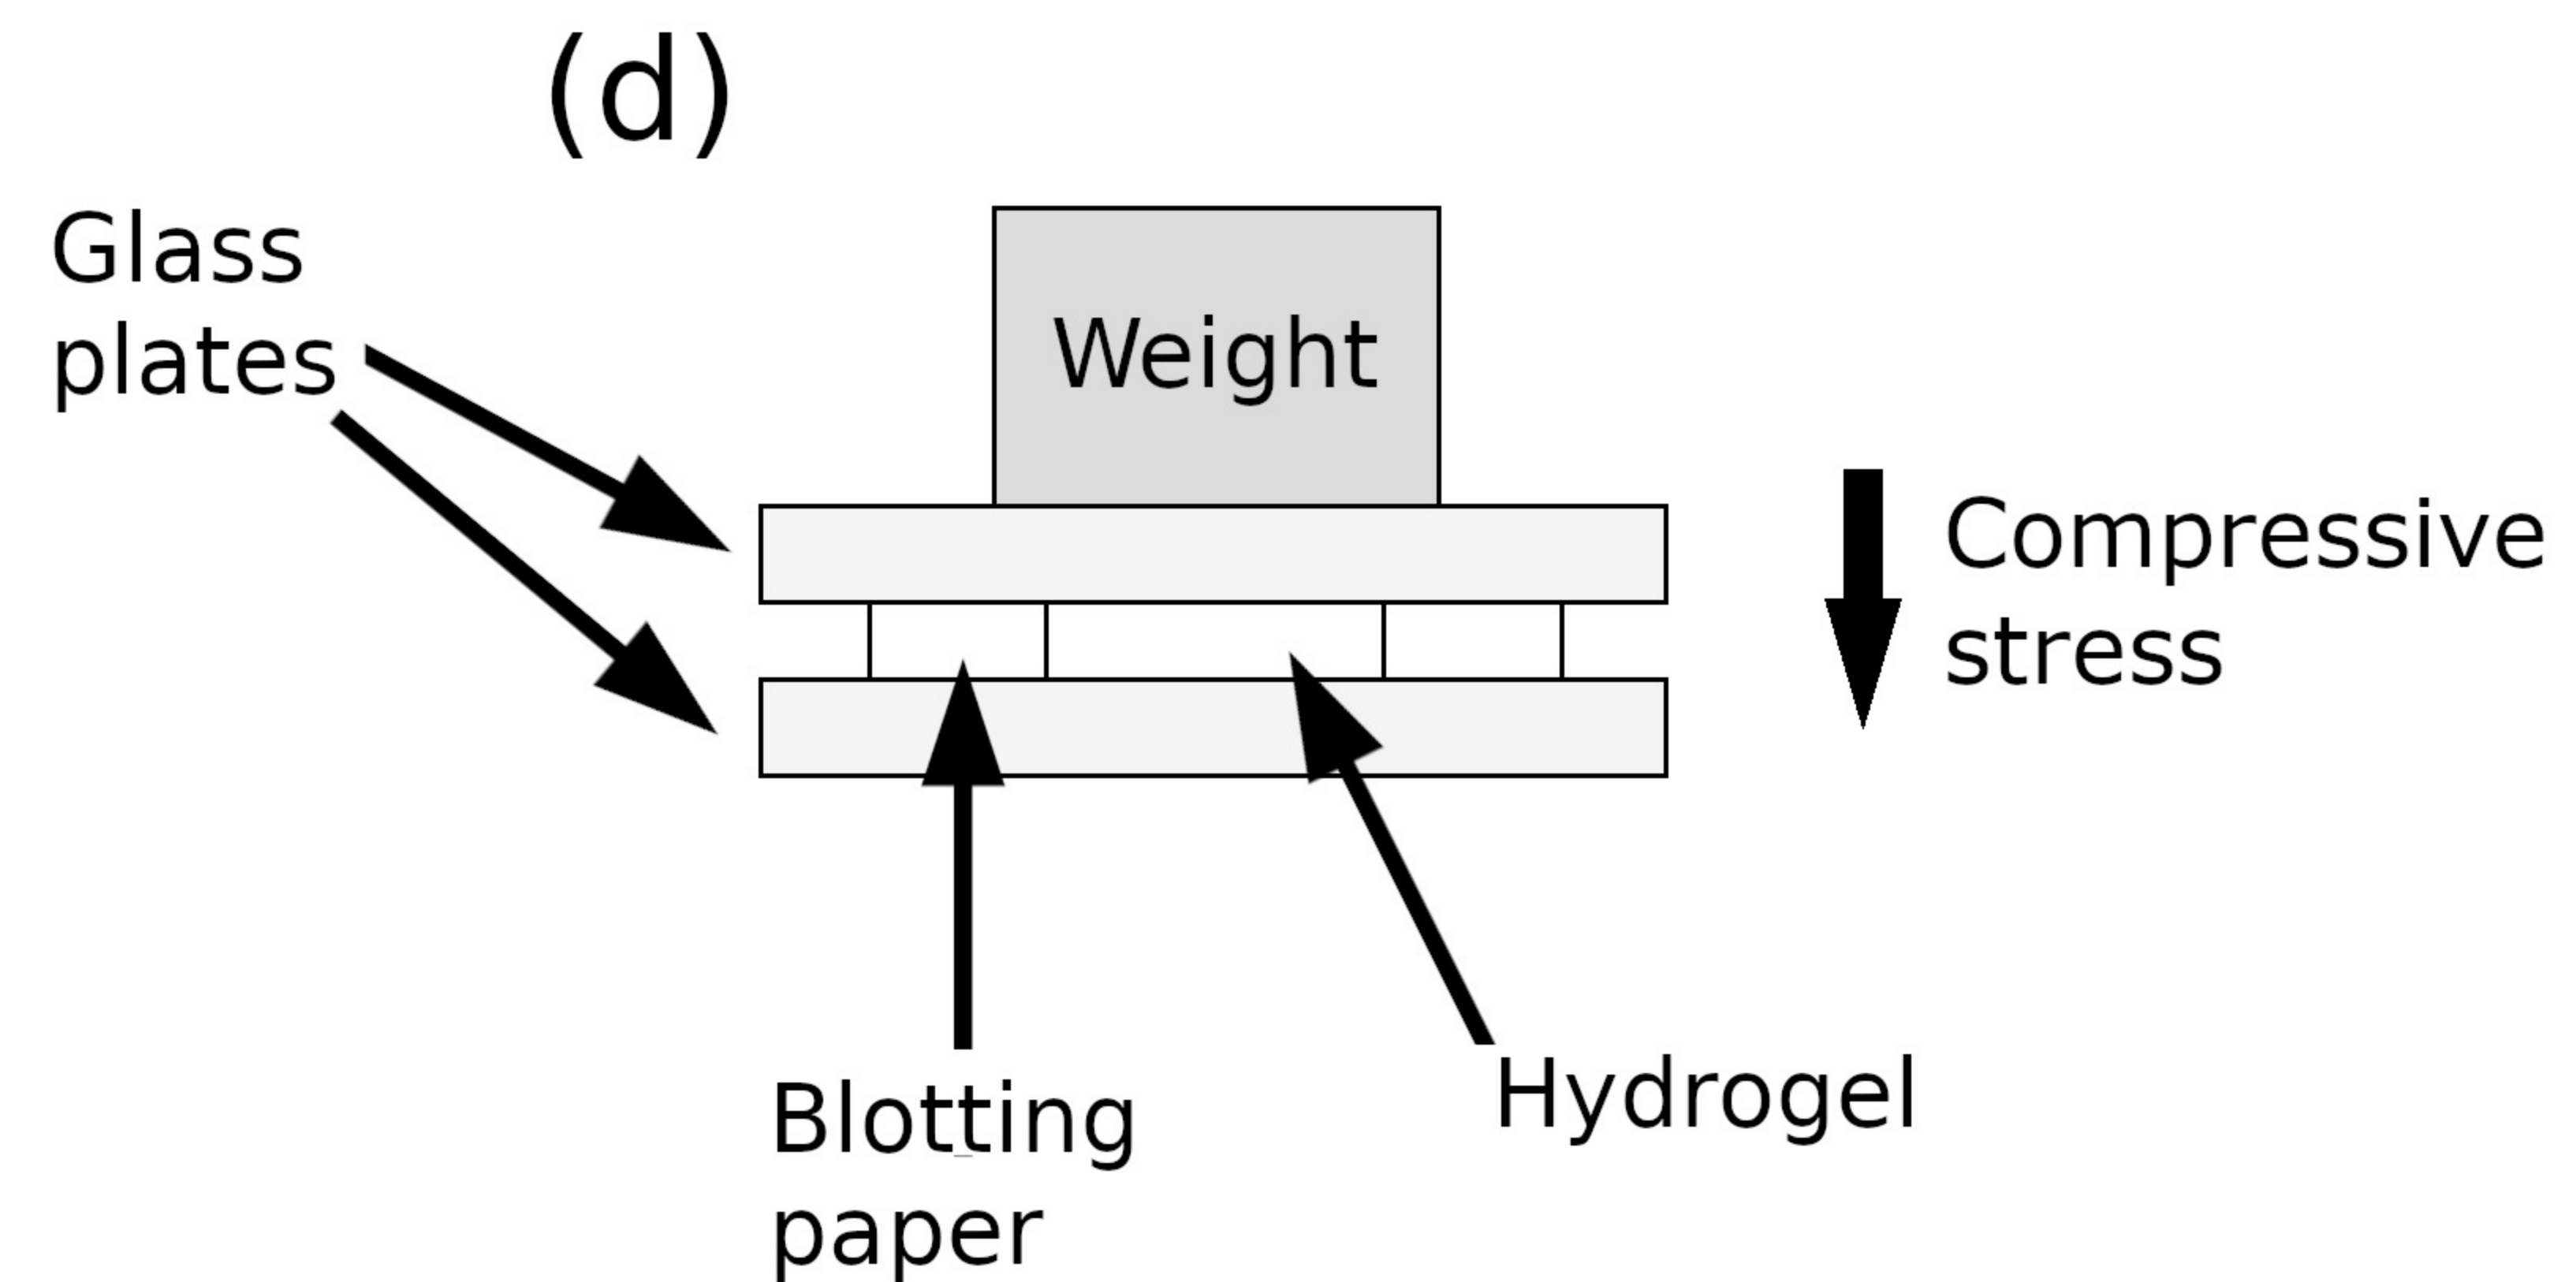

Supplement: s1 [file s1]
